# Supplementary material for: Steric control in the metal–ligand electron transfer of iminopyridine–ytterbocene complexes
Source: Royal Society of Chemistry journal article supplement (doi:10.1039/c7dt04299j), 2017-12-21
Supplement: c7dt04299j1.pdf [file c7dt04299j1.pdf]

## Electronic supporting information

### Steric Control in Metal-Ligand Electron Transfer of Iminopyridine-Ytterbocene Complexes

Alexander A. Trifonov,<sup>a,b,\*</sup> Tatyana V. Mahrova,<sup>a</sup> Lapo Luconi,<sup>c</sup> Giuliano Giambastiani,<sup>c,d,\*</sup>  
Dmitry M. Lyubov,<sup>a</sup> Anton V. Cherkasov,<sup>a</sup> Lorenzo Sorace,<sup>e</sup> Elisa Louyriac,<sup>f</sup> Laurent Maron,<sup>f,\*</sup>  
Konstantin A. Lyssenko<sup>b</sup>

- <sup>a</sup> *G. A. Razuvaev Institute of Organometallic Chemistry of Russian Academy of Sciences, Tropinina str. 49, 603950 Nizhny Novgorod, GSP-445, Russia*  
<sup>b</sup> *A. N. Nesmeyanov Institute of Organoelement Compounds of Russian Academy of Sciences, 28 Vavilova str., 119991, Moscow, GSP-1, Russia*  
<sup>c</sup> *Istituto di Chimica dei Composti Organometallici (ICCOM - CNR), Via Madonna del Piano 10, 50019, Sesto Fiorentino, Italy*  
<sup>d</sup> *Kazan Federal University, 420008 Kazan, Russian Federation*  
<sup>e</sup> *Dipartimento di Chimica "U. Schiff" and UdR INSTM, Università di Firenze, 50019 Sesto Fiorentino, Italy*  
<sup>f</sup> *Université de Toulouse, INSA, UPS, CNRS-UMR5215, LPCNO Avenue de Rangueil 135, 31077 Toulouse, France*

## Contents

**Table S1.** Crystallographic data and structure refinement details **3a–d**.

**Figure S1.** <sup>1</sup>H NMR spectrum of (C<sub>5</sub>Me<sub>5</sub>)<sub>2</sub>Yb[2,6-<sup>i</sup>Pr<sub>2</sub>(C<sub>6</sub>H<sub>3</sub>)NCH(C<sub>5</sub>H<sub>4</sub>N)]<sup>-</sup> (**3a**).

**Figure S2.** UV-Vis spectra of (C<sub>5</sub>Me<sub>5</sub>)<sub>2</sub>Yb[2,6-<sup>i</sup>Pr<sub>2</sub>(C<sub>6</sub>H<sub>3</sub>)NCH(C<sub>5</sub>H<sub>4</sub>N)]<sup>-</sup> (**3a**), radical-anionic (**2a**)<sup>-</sup>K<sup>+</sup> and neutral **2a**.

**Figure S3.** IR spectrum of (C<sub>5</sub>Me<sub>5</sub>)<sub>2</sub>Yb[2,6-<sup>i</sup>Pr<sub>2</sub>(C<sub>6</sub>H<sub>3</sub>)NCH(C<sub>5</sub>H<sub>4</sub>N)]<sup>-</sup> (**3a**).

**Figure S4.** <sup>1</sup>H NMR spectrum of (C<sub>5</sub>Me<sub>5</sub>)<sub>2</sub>Yb<sup>2+</sup>[2,6-<sup>i</sup>Pr<sub>2</sub>C<sub>6</sub>H<sub>3</sub>NCH(C<sub>5</sub>H<sub>3</sub>N-C<sub>4</sub>H<sub>3</sub>O)] (**3b**).

**Figure S5.** <sup>1</sup>H NMR spectrum of (C<sub>5</sub>Me<sub>5</sub>)<sub>2</sub>Yb<sup>2+</sup>[2,6-<sup>i</sup>Pr<sub>2</sub>C<sub>6</sub>H<sub>3</sub>NCH(C<sub>5</sub>H<sub>3</sub>N-C<sub>4</sub>H<sub>3</sub>O)] (**3b**), spectrum width – 200 ppm.

**Figure S6.** <sup>13</sup>C {<sup>1</sup>H} NMR spectrum of (C<sub>5</sub>Me<sub>5</sub>)<sub>2</sub>Yb<sup>2+</sup>[2,6-<sup>i</sup>Pr<sub>2</sub>C<sub>6</sub>H<sub>3</sub>NCH(C<sub>5</sub>H<sub>3</sub>N-C<sub>4</sub>H<sub>3</sub>O)] (**3b**).

**Figure S7.** UV-Vis spectra of (C<sub>5</sub>Me<sub>5</sub>)<sub>2</sub>Yb<sup>2+</sup>[2,6-<sup>i</sup>Pr<sub>2</sub>C<sub>6</sub>H<sub>3</sub>NCH(C<sub>5</sub>H<sub>3</sub>N-C<sub>4</sub>H<sub>3</sub>O)] (**3b**) and neutral **2b**.

**Figure S8.** IR spectrum of (C<sub>5</sub>Me<sub>5</sub>)<sub>2</sub>Yb<sup>2+</sup>[2,6-<sup>i</sup>Pr<sub>2</sub>C<sub>6</sub>H<sub>3</sub>NCH(C<sub>5</sub>H<sub>3</sub>N-C<sub>4</sub>H<sub>3</sub>O)] (**3b**).

**Figure S9.** <sup>1</sup>H NMR spectrum of (C<sub>5</sub>Me<sub>5</sub>)<sub>2</sub>Yb<sup>2+</sup>[2,6-<sup>i</sup>Pr<sub>2</sub>C<sub>6</sub>H<sub>3</sub>NCH(C<sub>5</sub>H<sub>3</sub>N-C<sub>4</sub>H<sub>3</sub>S)] (**3c**).

**Figure S10.** <sup>1</sup>H NMR spectrum of (C<sub>5</sub>Me<sub>5</sub>)<sub>2</sub>Yb<sup>2+</sup>[2,6-<sup>i</sup>Pr<sub>2</sub>C<sub>6</sub>H<sub>3</sub>NCH(C<sub>5</sub>H<sub>3</sub>N-C<sub>4</sub>H<sub>3</sub>S)] (**3c**).

**Figure S11.** UV-Vis spectra of (C<sub>5</sub>Me<sub>5</sub>)<sub>2</sub>Yb<sup>2+</sup>[2,6-<sup>i</sup>Pr<sub>2</sub>C<sub>6</sub>H<sub>3</sub>NCH(C<sub>5</sub>H<sub>3</sub>N-C<sub>4</sub>H<sub>3</sub>S)] (**3c**).

**Figure S12.** IR spectrum of (C<sub>5</sub>Me<sub>5</sub>)<sub>2</sub>Yb<sup>2+</sup>[2,6-<sup>i</sup>Pr<sub>2</sub>C<sub>6</sub>H<sub>3</sub>NCH(C<sub>5</sub>H<sub>3</sub>N-C<sub>4</sub>H<sub>3</sub>S)] (**3c**).

**Figure S13.**  $^1\text{H}$  NMR spectrum of  $(\text{C}_5\text{Me}_5)_2\text{Yb}^{2+}[\text{2,6-}^i\text{Pr}_2\text{C}_6\text{H}_3\text{NCH}(\text{C}_5\text{H}_3\text{N-C}_6\text{H}_5)]$  (**3d**).

**Figure S14.**  $^1\text{H}$  NMR spectrum of  $(\text{C}_5\text{Me}_5)_2\text{Yb}^{2+}[\text{2,6-}^i\text{Pr}_2\text{C}_6\text{H}_3\text{NCH}(\text{C}_5\text{H}_3\text{N-C}_6\text{H}_5)]$  (**3d**).

**Figure S15.** UV-Vis spectra of  $(\text{C}_5\text{Me}_5)_2\text{Yb}^{2+}[\text{2,6-}^i\text{Pr}_2\text{C}_6\text{H}_3\text{NCH}(\text{C}_5\text{H}_3\text{N-C}_6\text{H}_5)]$  (**3d**) and neutral **2d**.

**Figure S16.** IR spectrum of  $(\text{C}_5\text{Me}_5)_2\text{Yb}^{2+}[\text{2,6-}^i\text{Pr}_2\text{C}_6\text{H}_3\text{NCH}(\text{C}_5\text{H}_3\text{N-C}_6\text{H}_5)]$  (**3d**) (KBr, Nujol).

**Figure S17.** Thermal dependence of the susceptibility of **3d** on first (full circles) and second (empty triangles) heating.

**Figure S18.** Thermal dependence of the magnetic moment of **3d** on first (black and white circles) and second (full triangles) heating, the latter rescaled of a factor 2.05 to evidence the superimposability of the magnetic behaviour in the low temperature region.

**Cartesian coordinates**

**Table S1.** Crystallographic data and structure refinement details **3a–d**.

| Compound                                                     | <b>3a</b>                                                         | <b>3b</b>                                                         | <b>3c</b>                                                         | <b>3d</b>                                                         |
|--------------------------------------------------------------|-------------------------------------------------------------------|-------------------------------------------------------------------|-------------------------------------------------------------------|-------------------------------------------------------------------|
| Empirical formula                                            | C <sub>38</sub> H <sub>52</sub> N <sub>2</sub> Yb                 | C <sub>49</sub> H <sub>62</sub> N <sub>2</sub> OYb                | C <sub>42</sub> H <sub>54</sub> N <sub>2</sub> SYb                | C <sub>44</sub> H <sub>56</sub> N <sub>2</sub> Yb                 |
| Formula weight                                               | 709.85                                                            | 868.04                                                            | 791.97                                                            | 785.94                                                            |
| Crystal system                                               | Monoclinic                                                        | Monoclinic                                                        | Orthorhombic                                                      | Orthorhombic                                                      |
| Space group                                                  | <i>P2<sub>1</sub>/c</i>                                           | <i>P2<sub>1</sub>/c</i>                                           | <i>Pna2<sub>1</sub></i>                                           | <i>Pbca</i>                                                       |
| <i>a</i> , Å                                                 | 14.9338(12)                                                       | 12.0399(7)                                                        | 16.0426(2)                                                        | 17.8249(10)                                                       |
| <i>b</i> , Å                                                 | 12.7510(9)                                                        | 14.7771(8)                                                        | 18.6629(3)                                                        | 17.7694(10)                                                       |
| <i>c</i> , Å                                                 | 17.6244(13)                                                       | 24.3929(14)                                                       | 12.4388(2)                                                        | 23.7557(13)                                                       |
| $\alpha$ , °                                                 | 90                                                                | 90                                                                | 90                                                                | 90                                                                |
| $\beta$ , °                                                  | 98.707(2)                                                         | 98.6090(10)                                                       | 90                                                                | 90                                                                |
| $\gamma$ , °                                                 | 90                                                                | 90                                                                | 90                                                                | 90                                                                |
| <i>V</i> , Å <sup>3</sup>                                    | 3317.4(4)                                                         | 4291.0(4)                                                         | 3724.20(10)                                                       | 7524.3(7)                                                         |
| <i>Z</i>                                                     | 4                                                                 | 4                                                                 | 4                                                                 | 8                                                                 |
| <i>d</i> <sub>calc</sub> , Mg/m <sup>3</sup>                 | 1.421                                                             | 1.344                                                             | 1.412                                                             | 1.388                                                             |
| Absorption coefficient, mm <sup>-1</sup>                     | 2.847                                                             | 2.216                                                             | 2.598                                                             | 2.518                                                             |
| <i>F</i> (000)                                               | 1456                                                              | 1792                                                              | 1624                                                              | 3232                                                              |
| Crystal size, mm                                             | 0.60 × 0.28 × 0.26                                                | 0.15 × 0.14 × 0.13                                                | 0.50 × 0.30 × 0.05                                                | 0.32 × 0.17 × 0.08                                                |
| $\theta$ range for data collection, °                        | 2.51–29.00                                                        | 2.18–28.70                                                        | 3.01–31.00                                                        | 2.06–26.02                                                        |
| Index ranges                                                 | –20 ≤ <i>h</i> ≤ 20<br>–17 ≤ <i>k</i> ≤ 17<br>–24 ≤ <i>l</i> ≤ 24 | –16 ≤ <i>h</i> ≤ 16<br>–19 ≤ <i>k</i> ≤ 19<br>–32 ≤ <i>l</i> ≤ 32 | –22 ≤ <i>h</i> ≤ 23<br>–26 ≤ <i>k</i> ≤ 27<br>–18 ≤ <i>l</i> ≤ 18 | –21 ≤ <i>h</i> ≤ 22<br>–21 ≤ <i>k</i> ≤ 21<br>–29 ≤ <i>l</i> ≤ 29 |
| Reflections collected                                        | 42132                                                             | 44438                                                             | 78244                                                             | 61940                                                             |
| Independent reflections                                      | 8805                                                              | 11078                                                             | 11824                                                             | 7412                                                              |
| <i>R</i> <sub>int</sub>                                      | 0.0341                                                            | 0.0561                                                            | 0.0484                                                            | 0.0905                                                            |
| Completeness to $\theta$ , %                                 | 99.7                                                              | 99.9                                                              | 99.8                                                              | 100.0                                                             |
| Data / restraints / parameters                               | 8805 / 0 / 388                                                    | 11078 / 0 / 496                                                   | 11824 / 1 / 434                                                   | 7412 / 7 / 455                                                    |
| <i>Goof</i> on <i>F</i> <sup>2</sup>                         | 1.034                                                             | 1.026                                                             | 1.031                                                             | 1.000                                                             |
| Final <i>R</i> indices ( <i>I</i> > 2 $\sigma$ ( <i>I</i> )) | <i>R</i> <sub>1</sub> = 0.0270<br><i>R</i> <sub>2</sub> = 0.0649  | <i>R</i> <sub>1</sub> = 0.0336<br><i>R</i> <sub>2</sub> = 0.0727  | <i>R</i> <sub>1</sub> = 0.0308<br><i>R</i> <sub>2</sub> = 0.0600  | <i>R</i> <sub>1</sub> = 0.0311<br><i>R</i> <sub>2</sub> = 0.0605  |
| <i>R</i> indices (all data)                                  | <i>R</i> <sub>1</sub> = 0.0326<br><i>R</i> <sub>2</sub> = 0.0667  | <i>R</i> <sub>1</sub> = 0.0531<br><i>R</i> <sub>2</sub> = 0.0800  | <i>R</i> <sub>1</sub> = 0.0445<br><i>R</i> <sub>2</sub> = 0.0644  | <i>R</i> <sub>1</sub> = 0.0649<br><i>R</i> <sub>2</sub> = 0.0690  |
| Largest diff. peak and hole, e/Å <sup>3</sup>                | 3.767 / –1.009                                                    | 2.436 / –0.012                                                    | 1.412 / –0.841                                                    | 1.682 / –0.495                                                    |

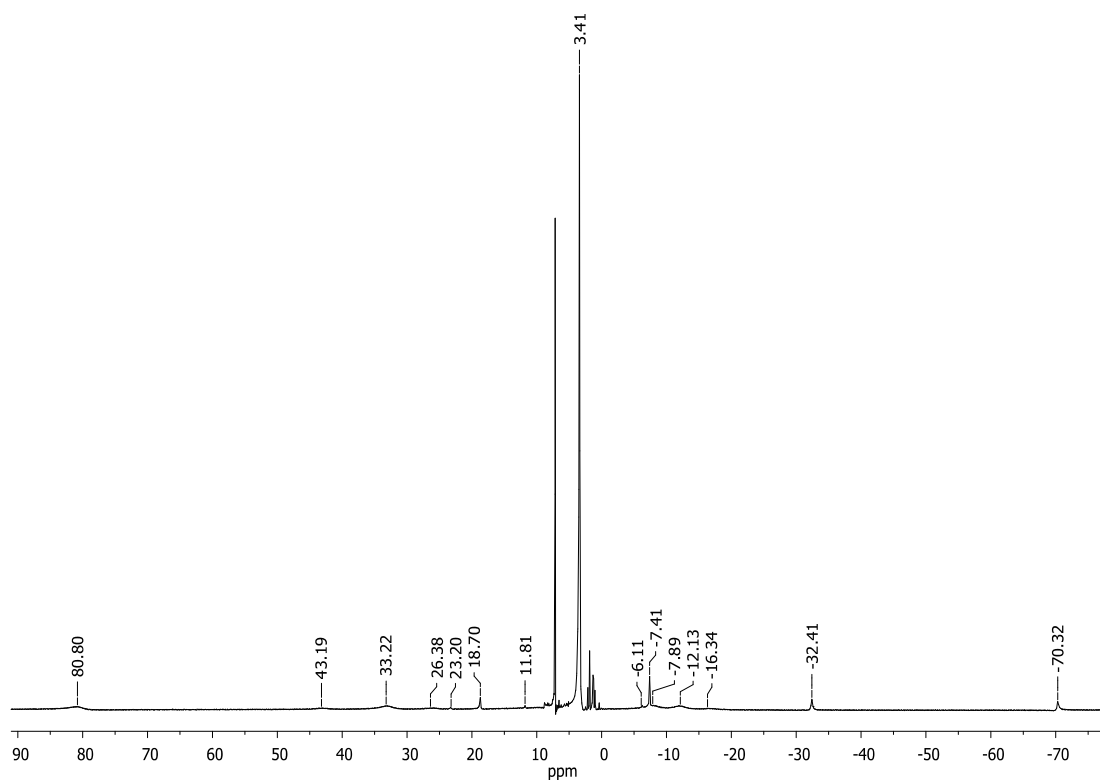

**Figure S1.**  $^1\text{H}$  NMR spectrum of  $(\text{C}_5\text{Me}_5)_2\text{Yb}[2,6\text{-}i\text{Pr}_2(\text{C}_6\text{H}_3)\text{NCH}(\text{C}_5\text{H}_4\text{N})]^-$  (**3a**) (200 MHz,  $\text{C}_6\text{D}_6$ , 293 K).

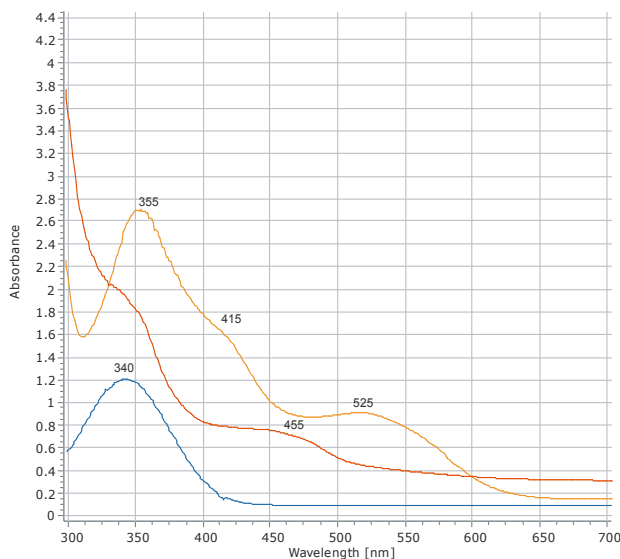

**Figure S2.** UV-vis spectra of  $(\text{C}_5\text{Me}_5)_2\text{Yb}[2,6\text{-}i\text{Pr}_2(\text{C}_6\text{H}_3)\text{NCH}(\text{C}_5\text{H}_4\text{N})]^-$  (**3a**) in nonane (red), radical-anionic adduct  $[2,6\text{-}i\text{Pr}_2(\text{C}_6\text{H}_3)\text{NCH}(\text{C}_5\text{H}_4\text{N})]^- \text{K}^+$  in THF (orange) and neutral **2a** in nonane (blue).

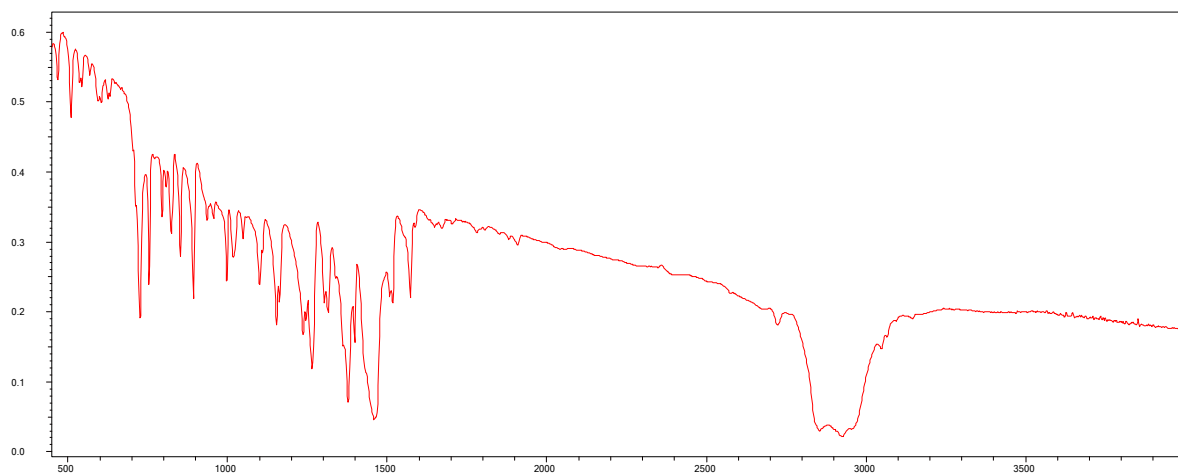

**Figure S3.** IR spectrum of  $(C_5Me_5)_2Yb[2,6-iPr_2C_6H_3NCH(C_5H_4N)]^-$  (**3a**) (KBr, Nujol).

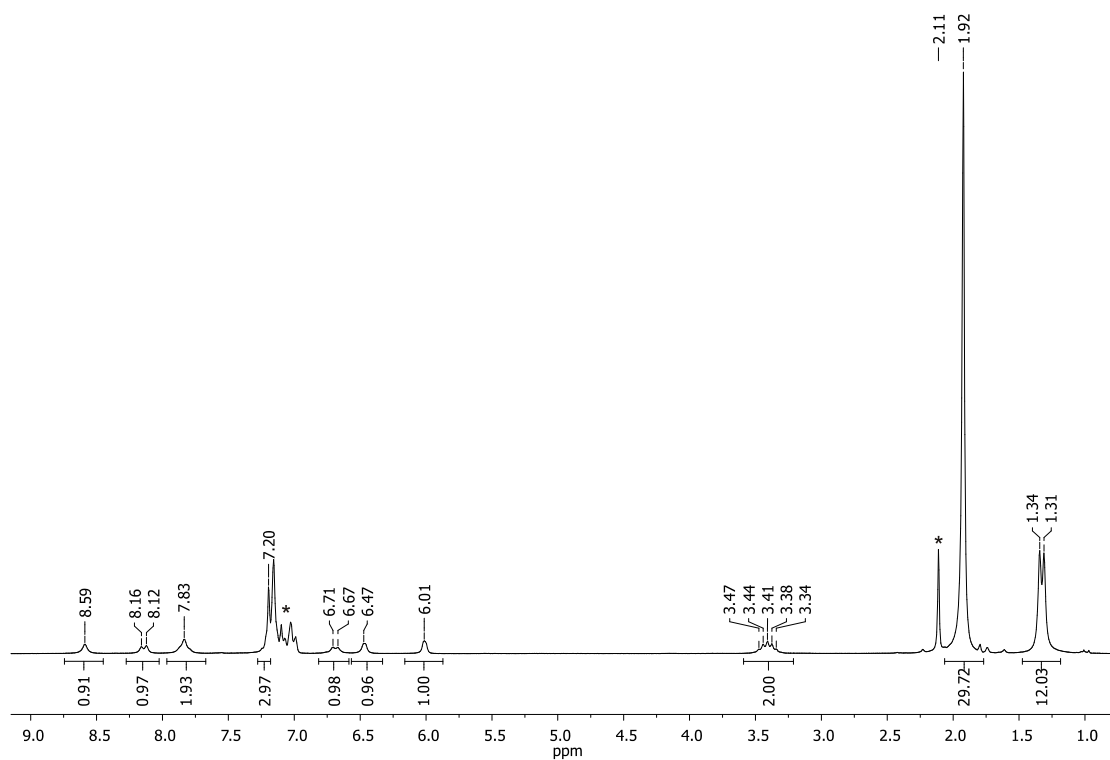

**Figure S4.**  $^1H$  NMR spectrum of  $(C_5Me_5)_2Yb^{2+}[2,6-iPr_2C_6H_3NCH(C_5H_3N-C_4H_3O)]$  (**3b**) (200 MHz,  $C_6D_6$ , 293 K); \* - signals of toluene solvate.

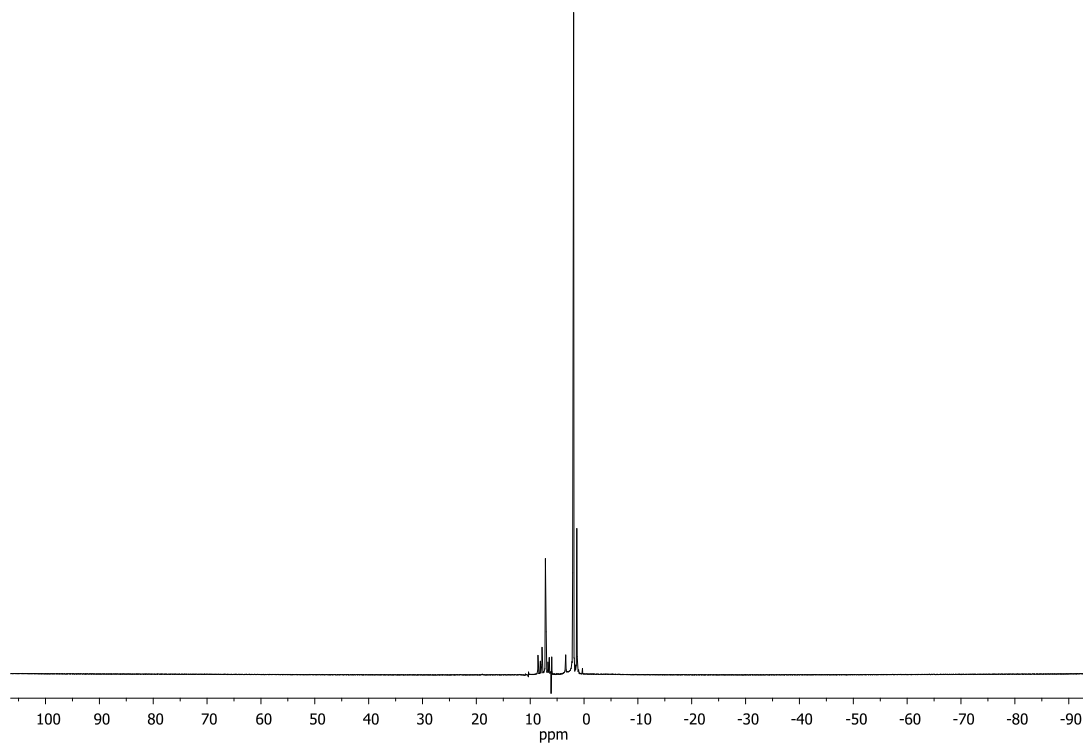

**Figure S5.**  $^1\text{H}$  NMR spectrum of  $(\text{C}_5\text{Me}_5)_2\text{Yb}^{2+}[\text{2,6-}i\text{Pr}_2\text{C}_6\text{H}_3\text{NCH}(\text{C}_5\text{H}_3\text{N-C}_4\text{H}_3\text{O})]$  (**3b**) (200 MHz,  $\text{C}_6\text{D}_6$ , 293 K), spectrum width – 200 ppm.

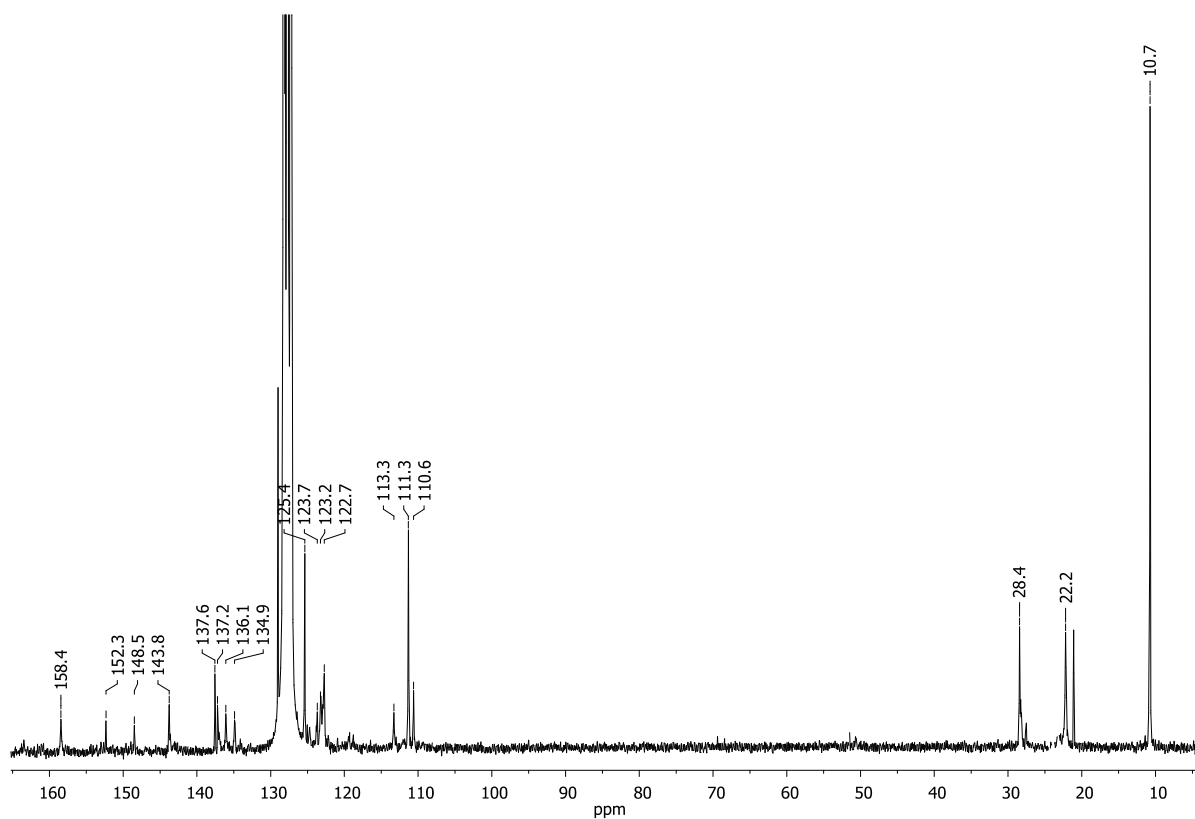

**Figure S6.**  $^{13}\text{C}\{^1\text{H}\}$  NMR spectrum of  $(\text{C}_5\text{Me}_5)_2\text{Yb}^{2+}[\text{2,6-}i\text{Pr}_2\text{C}_6\text{H}_3\text{NCH}(\text{C}_5\text{H}_3\text{N-C}_4\text{H}_3\text{O})]$  (**3b**) (50 MHz,  $\text{C}_6\text{D}_6$ , 293 K).

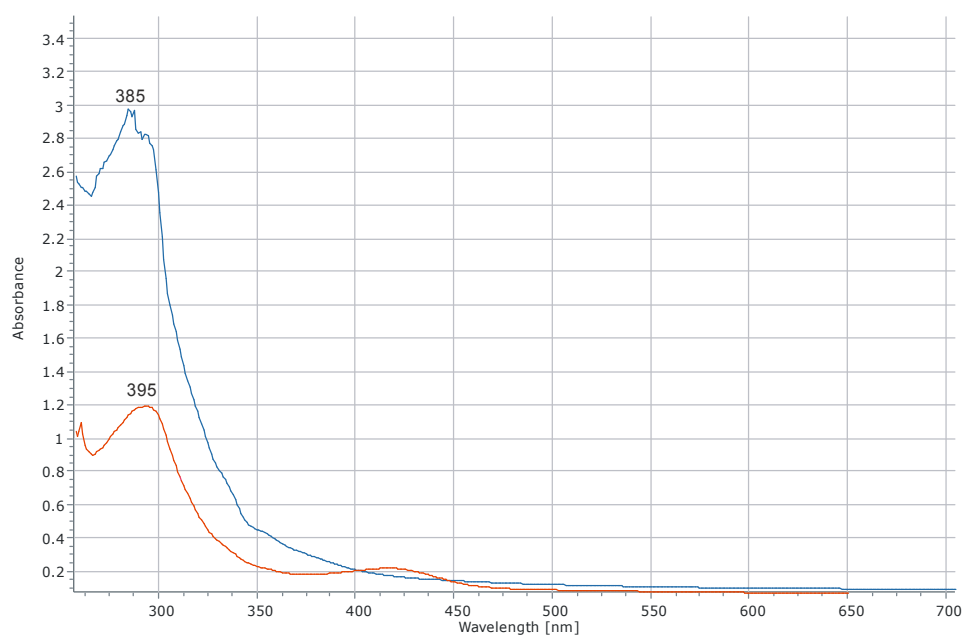

**Figure S7.** UV-Vis spectra of  $(C_5Me_5)_2Yb^{2+}[2,6-iPr_2C_6H_3NCH(C_5H_3N-C_4H_3O)]$  (**3b**) – blue; neutral **2b** – red.

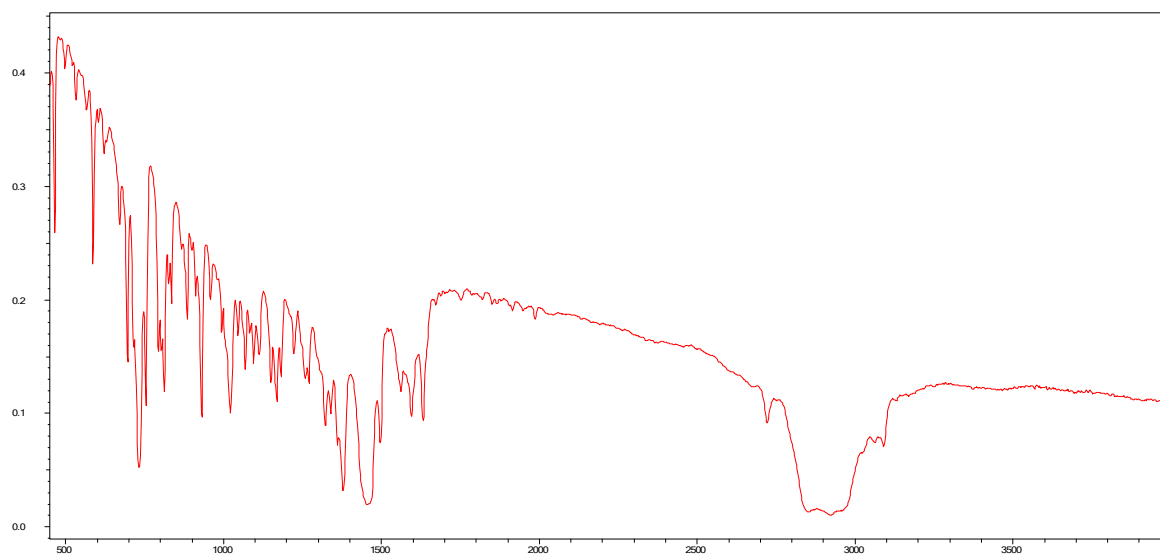

**Figure S8.** IR spectrum of  $(C_5Me_5)_2Yb^{2+}[2,6-iPr_2C_6H_3NCH(C_5H_3N-C_4H_3O)]$  (**3b**) (KBr, Nujol).

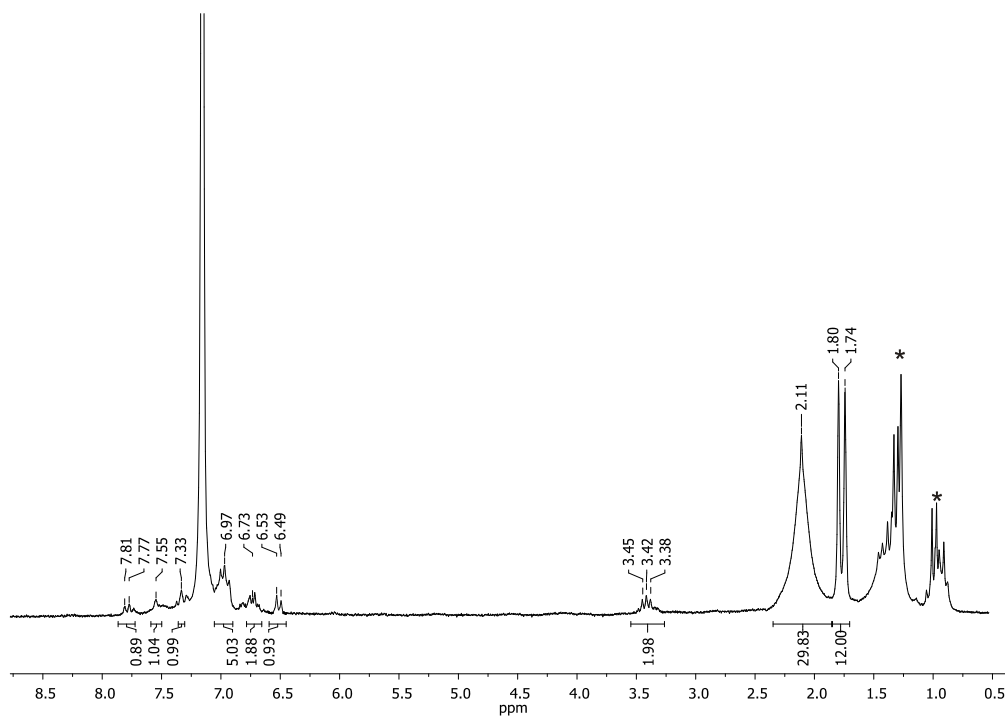

**Figure S9.** <sup>1</sup>H NMR spectrum of  $(C_5Me_5)_2Yb^{2+}[2,6-Pr_2C_6H_3NCH(C_5H_3N-C_4H_3S)]$  (**3c**) (200 MHz,  $C_6D_6$ , 293 K); \* – signals of nonane solvate.

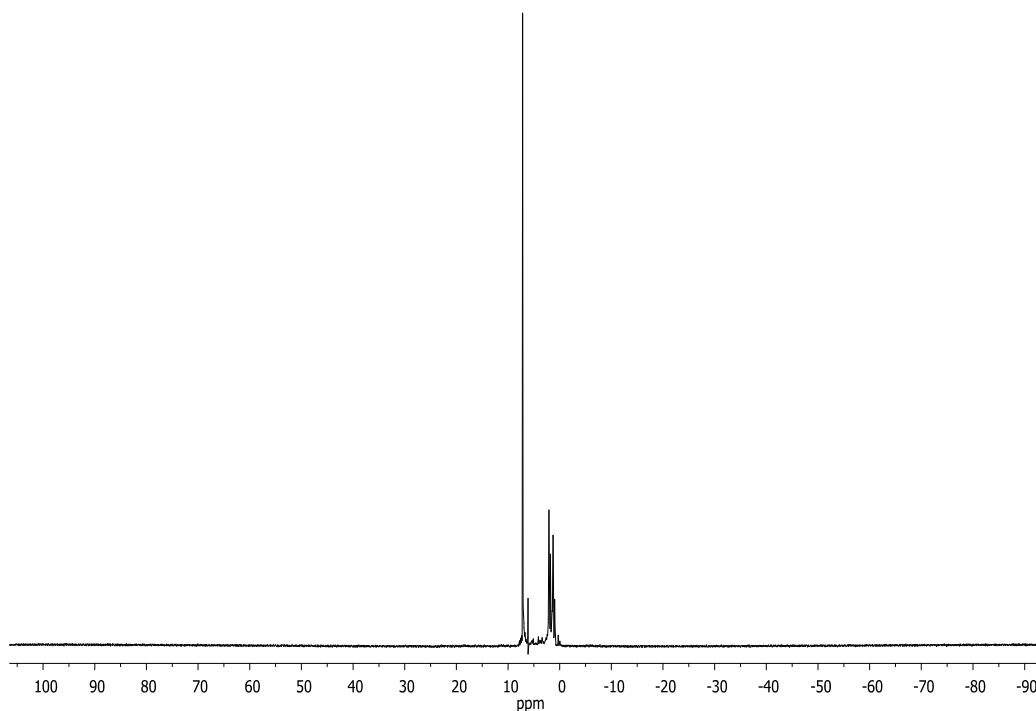

**Figure S10.** <sup>1</sup>H NMR spectrum of  $(C_5Me_5)_2Yb^{2+}[2,6-Pr_2C_6H_3NCH(C_5H_3N-C_4H_3S)]$  (**3c**) (200 MHz,  $C_6D_6$ , 293 K); spectrum width – 200 ppm.



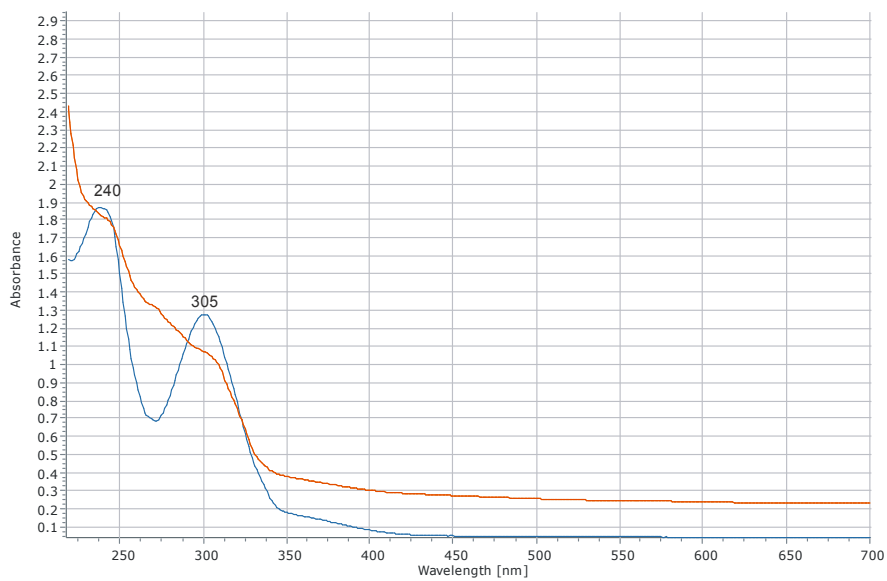

**Figure S11.** UV-Vis spectra of  $(C_5Me_5)_2Yb^{2+}[2,6-iPr_2C_6H_3NCH(C_5H_3N-C_4H_3S)]$  (**3c**)– red; neutral **2c** – blue.

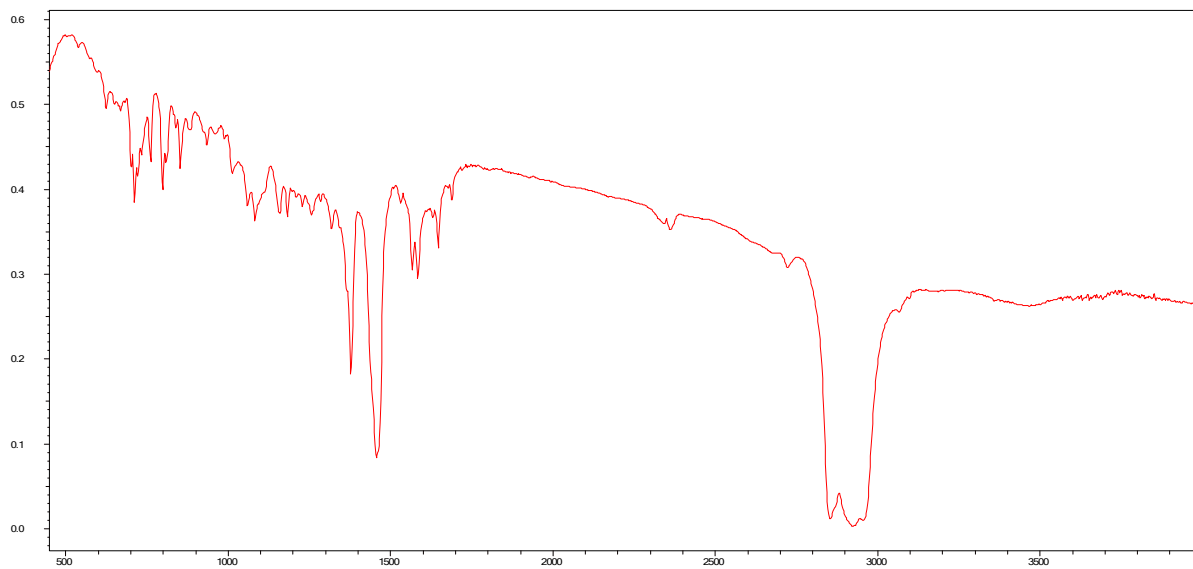

**Figure S12.** IR spectrum of  $(C_5Me_5)_2Yb^{2+}[2,6-iPr_2C_6H_3NCH(C_5H_3N-C_4H_3S)]$  (**3c**) (KBr, Nujol).

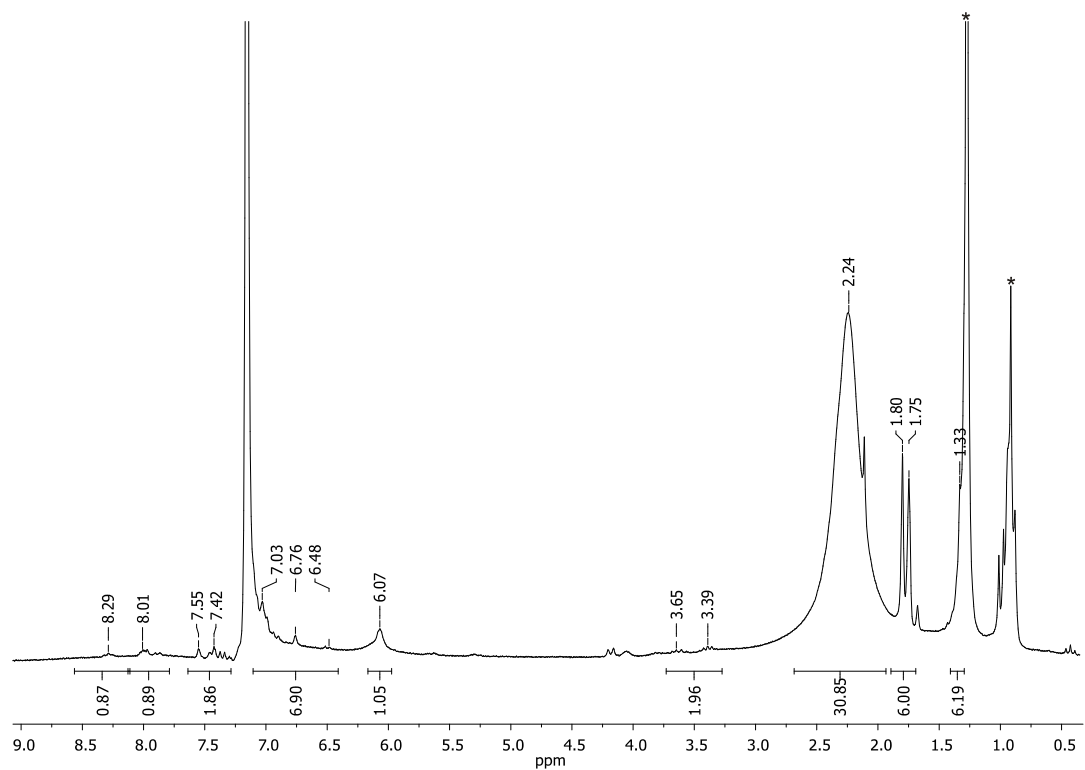

**Figure S13.**  $^1\text{H}$  NMR spectrum of  $(\text{C}_5\text{Me}_5)_2\text{Yb}^{2+}[\text{2,6-}i\text{Pr}_2\text{C}_6\text{H}_3\text{NCH}(\text{C}_5\text{H}_3\text{N-C}_6\text{H}_5)]$  (**3d**) (200 MHz,  $\text{C}_6\text{D}_6$ , 293 K); \* – signals of nonane solvate.

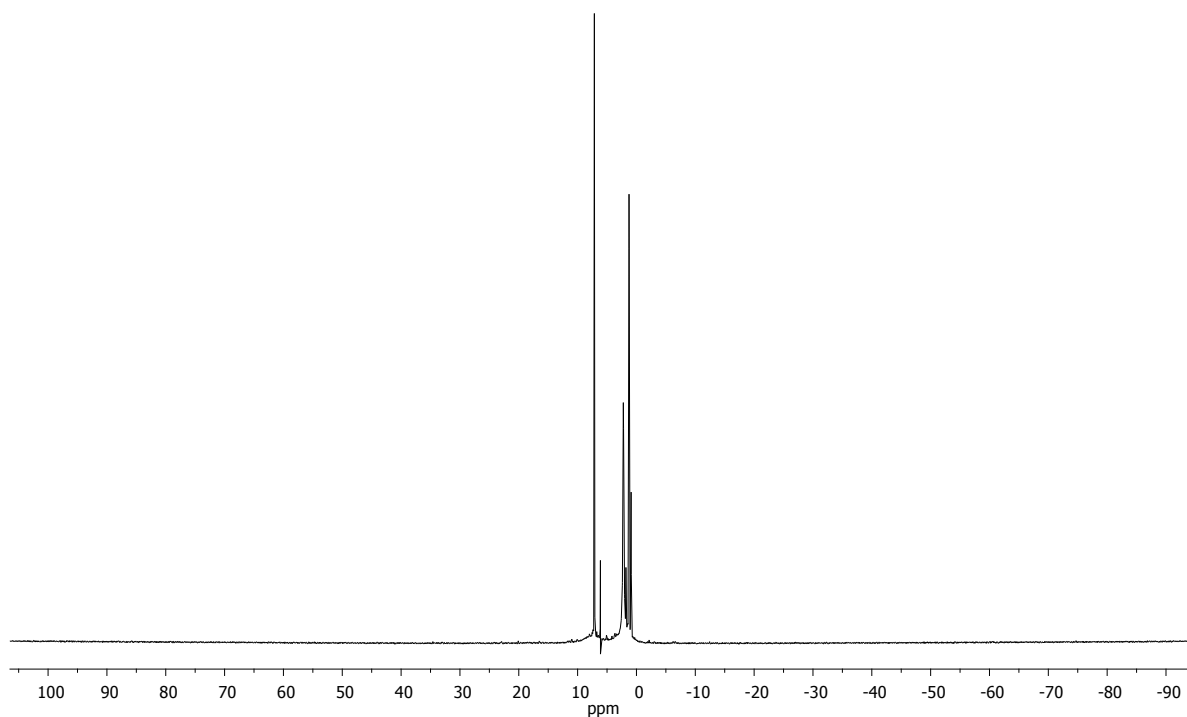

**Figure S14.**  $^1\text{H}$  NMR spectrum of  $(\text{C}_5\text{Me}_5)_2\text{Yb}^{2+}[\text{2,6-}i\text{Pr}_2\text{C}_6\text{H}_3\text{NCH}(\text{C}_5\text{H}_3\text{N-C}_6\text{H}_5)]$  (**3d**) (200 MHz,  $\text{C}_6\text{D}_6$ , 293 K); spectrum width – 200 ppm.

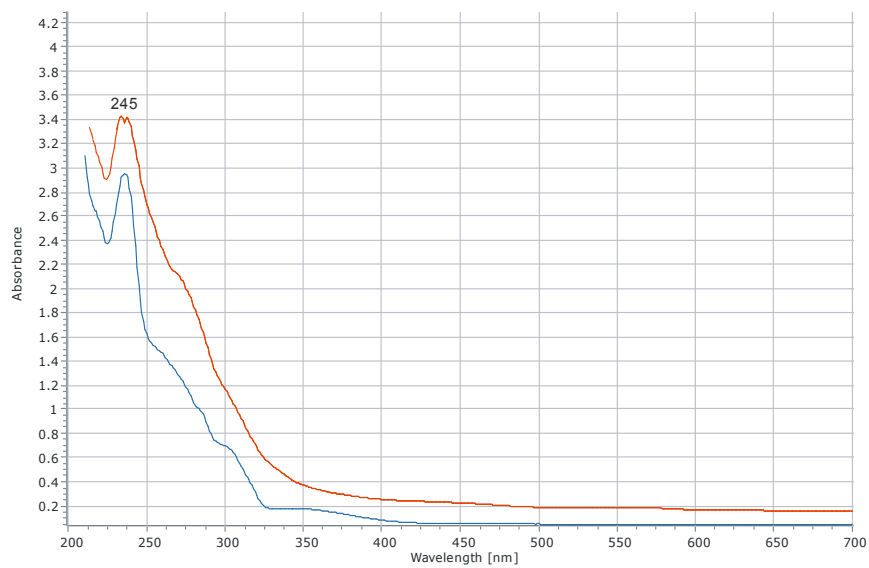

**Figure S15.** UV-Vis spectra of  $(C_5Me_5)_2Yb^{2+}[2,6-iPr_2C_6H_3NCH(C_5H_3N-C_6H_5)]$  (**3d**) – red; neutral **2d** – blue.

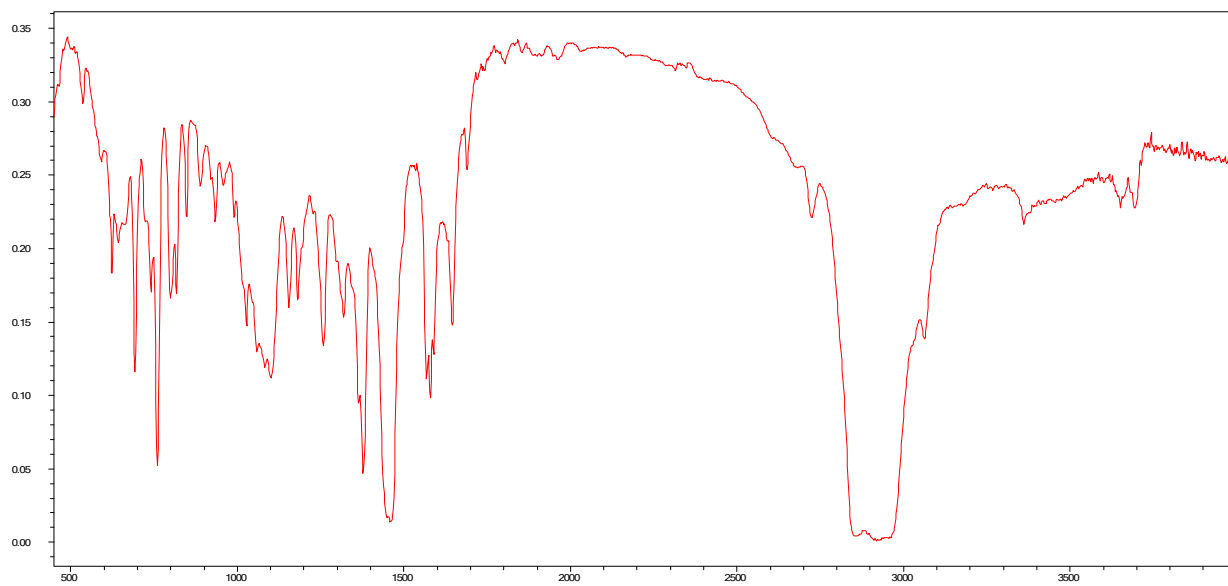

**Figure S16.** IR spectrum of  $(C_5Me_5)_2Yb^{2+}[2,6-iPr_2C_6H_3NCH(C_5H_3N-C_6H_5)]$  (**3d**) (KBr, Nujol).

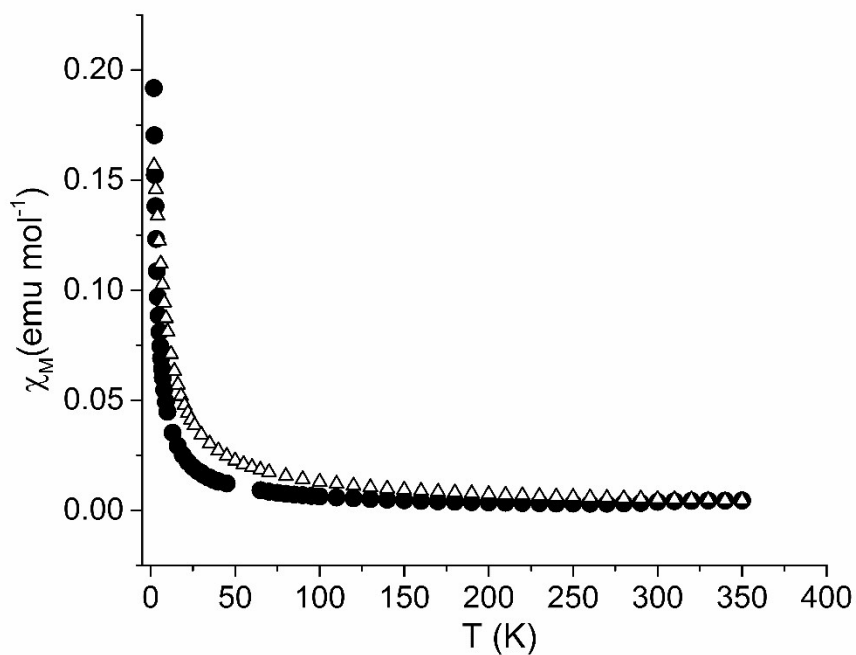

**Figure S17.** Thermal dependence of the susceptibility of **3d** on first (full circles) and second (empty triangles) heating.

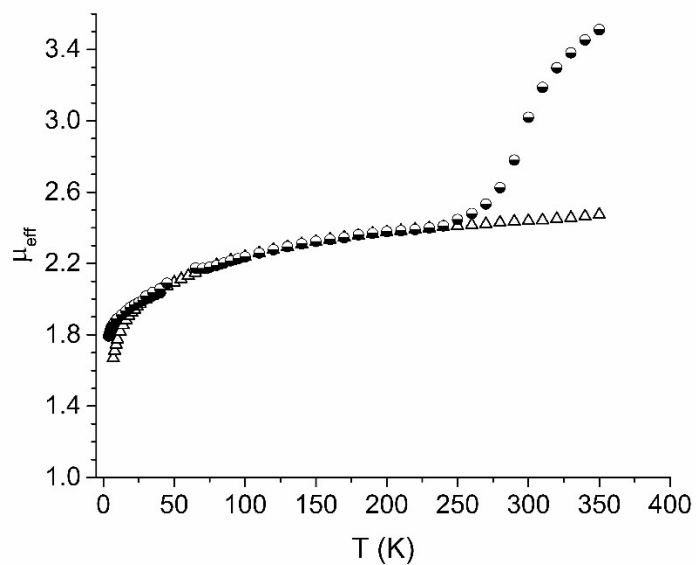

**Figure S18.** Thermal dependence of the magnetic moment of **3d** on first (black and white circles) and second (full triangles) heating, the latter rescaled of a factor 2.05 to evidence the superimposability of the magnetic behaviour in the low temperature region.

## Cartesian coordinates

Yb(bisindenyl)

E = -1853.791562

H = -1853.515184

G = -1853.579497

|    |           |           |           |
|----|-----------|-----------|-----------|
| Yb | -0.279241 | 1.883771  | 0.592592  |
| C  | 0.925065  | 4.088182  | -0.129616 |
| C  | 0.854330  | 4.181673  | 1.295038  |
| C  | 1.726201  | 3.203850  | 1.828025  |
| C  | 2.313996  | 2.458453  | 0.779572  |
| C  | 1.841110  | 3.006245  | -0.453803 |
| C  | 2.035105  | 2.641006  | -1.810966 |
| C  | 1.351858  | 3.319829  | -2.804107 |
| C  | 0.456093  | 4.374317  | -2.487481 |
| C  | 0.238788  | 4.757066  | -1.175886 |
| C  | -2.477604 | 0.465254  | 0.583967  |
| C  | -2.781163 | 1.562244  | 1.449703  |
| C  | -2.000896 | 1.408295  | 2.619203  |
| C  | -1.173779 | 0.267132  | 2.500919  |
| C  | -1.468737 | -0.347605 | 1.244611  |
| C  | -0.917611 | -1.463597 | 0.563480  |
| C  | -1.352127 | -1.764527 | -0.715047 |
| C  | -2.338614 | -0.972674 | -1.358857 |
| C  | -2.895948 | 0.125443  | -0.728461 |
| H  | -0.442761 | 5.573593  | -0.946748 |
| H  | -0.060884 | 4.890810  | -3.291806 |
| H  | 1.503919  | 3.047199  | -3.844972 |
| H  | 2.724467  | 1.839335  | -2.067644 |
| H  | 1.915858  | 3.048693  | 2.885037  |
| H  | 0.296127  | 4.917949  | 1.861835  |
| H  | 3.051764  | 1.671539  | 0.889595  |
| H  | -0.938217 | -2.623589 | -1.236230 |
| H  | -2.661901 | -1.239261 | -2.361486 |
| H  | -3.656973 | 0.719585  | -1.230076 |
| H  | -0.167556 | -2.083795 | 1.049806  |
| H  | -0.497549 | -0.113515 | 3.257704  |
| H  | -2.033056 | 2.067425  | 3.480514  |
| H  | -3.532430 | 2.324924  | 1.277847  |

THF

E = -232.380813

H = -232.257719

G = -232.292888

|   |          |           |           |
|---|----------|-----------|-----------|
| C | 1.374144 | -0.031742 | -0.456380 |
| O | 0.158007 | 0.496670  | 0.053248  |
| C | 0.052352 | 0.000495  | 1.378405  |
| C | 1.466341 | 0.112883  | 1.964665  |
| C | 2.375004 | -0.007281 | 0.717028  |
| H | 3.051960 | 0.848472  | 0.641842  |
| H | 2.990042 | -0.912160 | 0.735627  |

|   |           |           |           |
|---|-----------|-----------|-----------|
| H | 1.600346  | 1.085413  | 2.447621  |
| H | 1.666175  | -0.660670 | 2.712273  |
| H | -0.699068 | 0.597954  | 1.901153  |
| H | -0.284159 | -1.050301 | 1.362574  |
| H | 1.212972  | -1.063322 | -0.810458 |
| H | 1.672247  | 0.583589  | -1.309260 |

Yb(bisindenyl)(THF)<sub>2</sub>

E = -2318.584994

H = -2318.058288

G = -2318.152599

|    |           |           |           |
|----|-----------|-----------|-----------|
| Yb | 0.979981  | 1.664167  | 0.725353  |
| C  | 0.672998  | 5.374872  | -0.103176 |
| C  | 1.254281  | 4.497267  | 0.845468  |
| C  | 0.832297  | 4.027262  | 2.124880  |
| C  | 1.891581  | 3.267378  | 2.668723  |
| C  | 2.952214  | 3.182417  | 1.737136  |
| C  | 2.587151  | 3.971106  | 0.605844  |
| C  | 3.281120  | 4.348325  | -0.570300 |
| C  | 2.688983  | 5.219205  | -1.467376 |
| C  | 1.385193  | 5.731977  | -1.235662 |
| C  | 2.199172  | -0.797796 | 1.186788  |
| C  | 3.583412  | -0.947976 | 0.913432  |
| C  | 4.509865  | -0.666229 | 1.899590  |
| C  | 4.098170  | -0.222750 | 3.183146  |
| C  | 2.760049  | -0.053181 | 3.480252  |
| C  | 1.781373  | -0.332511 | 2.494906  |
| C  | 0.353673  | -0.296364 | 2.507039  |
| C  | -0.090400 | -0.777852 | 1.253085  |
| C  | 1.018742  | -1.052268 | 0.423396  |
| O  | 1.442383  | 1.573860  | -1.718349 |
| C  | 0.841614  | 2.371066  | -2.766686 |
| C  | 1.800577  | 2.302801  | -3.952187 |
| C  | 2.519966  | 0.970466  | -3.724028 |
| C  | 2.645555  | 0.943487  | -2.208274 |
| O  | -1.477273 | 2.147425  | 0.428040  |
| C  | -2.373412 | 1.983030  | 1.551933  |
| C  | -3.733877 | 2.476088  | 1.072222  |
| C  | -3.345016 | 3.547010  | 0.050119  |
| C  | -2.120382 | 2.922551  | -0.605742 |
| H  | 2.455636  | 0.272356  | 4.472913  |
| H  | 4.849555  | -0.020776 | 3.942338  |
| H  | 5.569834  | -0.799415 | 1.697563  |
| H  | 3.914742  | -1.324270 | -0.052851 |
| H  | -1.126290 | -0.923364 | 0.962878  |
| H  | -0.267255 | -0.057812 | 3.363537  |
| H  | 0.973512  | -1.471808 | -0.575377 |
| H  | 0.955316  | 6.435099  | -1.945406 |
| H  | 3.236477  | 5.540200  | -2.350673 |
| H  | 4.294339  | 3.989017  | -0.741655 |
| H  | -0.307421 | 5.810009  | 0.085355  |
| H  | -0.085168 | 4.300555  | 2.633927  |
| H  | 1.891419  | 2.804590  | 3.649370  |

|   |           |           |           |
|---|-----------|-----------|-----------|
| H | 3.897934  | 2.677693  | 1.895949  |
| H | -1.990240 | 2.585353  | 2.384408  |
| H | -2.363056 | 0.930812  | 1.844678  |
| H | -2.404639 | 2.244384  | -1.421773 |
| H | -1.400246 | 3.655720  | -0.978240 |
| H | -3.073678 | 4.480645  | 0.555161  |
| H | -4.136121 | 3.766490  | -0.672267 |
| H | 1.907626  | 0.130976  | -4.072772 |
| H | 3.491965  | 0.915285  | -4.222019 |
| H | 1.275962  | 2.353197  | -4.910469 |
| H | 2.512540  | 3.133203  | -3.906488 |
| H | -0.132396 | 1.925258  | -3.004361 |
| H | 0.704858  | 3.388951  | -2.390959 |
| H | 2.691125  | -0.058844 | -1.778667 |
| H | 3.512252  | 1.521809  | -1.863668 |
| H | -4.345234 | 2.861880  | 1.892561  |
| H | -4.288943 | 1.665354  | 0.586660  |

N2Ph (2a in *Dalton Trans.*, 2011,40,10568)

E = -1039.375785

H = -1038.909512

G = -1038.992497

|   |           |           |           |
|---|-----------|-----------|-----------|
| C | -2.797862 | 1.545883  | 0.834138  |
| C | -2.077716 | 0.347763  | 1.052234  |
| C | -2.624509 | -0.909541 | 0.691201  |
| C | -3.862058 | -0.914039 | 0.032566  |
| C | -4.545614 | 0.260864  | -0.258971 |
| C | -4.012804 | 1.482043  | 0.150248  |
| N | -0.838013 | 0.455055  | 1.722834  |
| C | 0.223871  | 0.096601  | 1.116386  |
| C | 1.567256  | 0.154951  | 1.726577  |
| C | 2.660510  | -0.309577 | 0.983965  |
| C | 3.922409  | -0.264222 | 1.574147  |
| C | 4.049675  | 0.242219  | 2.860310  |
| C | 2.899037  | 0.703916  | 3.535551  |
| N | 1.691003  | 0.648066  | 2.964026  |
| C | 2.952965  | 1.264412  | 4.910331  |
| C | 4.166148  | 1.567621  | 5.552322  |
| C | 4.179701  | 2.087064  | 6.844749  |
| C | 2.981122  | 2.314316  | 7.524571  |
| C | 1.769553  | 2.021453  | 6.895376  |
| C | 1.754196  | 1.505187  | 5.602150  |
| C | -1.927464 | -2.240092 | 0.956445  |
| C | -1.529820 | -2.920314 | -0.371128 |
| C | -2.251224 | 2.886662  | 1.308246  |
| C | -2.028912 | 3.855185  | 0.126949  |
| C | -2.757279 | -3.201321 | 1.832291  |
| C | -3.152248 | 3.514514  | 2.374113  |
| H | -2.700337 | 4.432195  | 2.768274  |
| H | -3.318828 | 2.829074  | 3.210806  |

|   |           |           |           |
|---|-----------|-----------|-----------|
| H | -4.131200 | 3.781122  | 1.957869  |
| H | -1.559791 | 3.346579  | -0.721520 |
| H | -1.386630 | 4.692995  | 0.423172  |
| H | -2.974946 | 4.282936  | -0.226322 |
| H | -2.521371 | -4.245572 | 1.598561  |
| H | -3.832632 | -3.057373 | 1.688651  |
| H | -2.554643 | -3.041994 | 2.896141  |
| H | -1.050817 | -2.211863 | -1.054616 |
| H | -2.408371 | -3.328236 | -0.884342 |
| H | -0.841549 | -3.754832 | -0.188678 |
| H | -4.552370 | 2.401924  | -0.062804 |
| H | -5.492622 | 0.226325  | -0.790880 |
| H | -4.300159 | -1.867733 | -0.252444 |
| H | 2.521089  | -0.698236 | -0.020783 |
| H | 4.796105  | -0.624224 | 1.037669  |
| H | 5.024117  | 0.267709  | 3.334384  |
| H | 0.199511  | -0.272473 | 0.078597  |
| H | 0.830769  | 2.195996  | 7.414308  |
| H | 2.992341  | 2.718577  | 8.533133  |
| H | 5.128482  | 2.319255  | 7.320933  |
| H | 5.114584  | 1.416939  | 5.045686  |
| H | 0.818062  | 1.278070  | 5.102646  |
| H | -1.274311 | 2.691034  | 1.762137  |
| H | -1.000968 | -2.023889 | 1.496335  |

N22Th (2b)

E = -972.157915

H = -971.725677

G = -971.806877

|   |           |           |           |
|---|-----------|-----------|-----------|
| C | -2.354006 | 1.454262  | -0.089304 |
| C | -2.019930 | 0.359668  | 0.747681  |
| C | -2.894647 | -0.751418 | 0.875545  |
| C | -4.042233 | -0.781252 | 0.081570  |
| C | -4.363228 | 0.264129  | -0.782886 |
| C | -3.531346 | 1.374103  | -0.844614 |
| N | -0.863238 | 0.370568  | 1.547112  |
| C | 0.284983  | 0.468763  | 1.004662  |
| C | 1.542659  | 0.524616  | 1.778183  |
| C | 2.755323  | 0.551538  | 1.078357  |
| C | 3.941957  | 0.601747  | 1.808923  |
| C | 3.880568  | 0.625477  | 3.193674  |
| C | 2.615501  | 0.596652  | 3.817635  |
| N | 1.478077  | 0.547970  | 3.115269  |
| C | 2.486069  | 0.623375  | 5.272238  |
| C | 3.451399  | 0.652801  | 6.248781  |
| C | 2.930634  | 0.673368  | 7.574493  |
| C | 1.565670  | 0.659898  | 7.610058  |
| S | 0.850894  | 0.619985  | 5.995190  |
| C | -2.646251 | -1.913769 | 1.828728  |
| C | -1.408399 | -2.752371 | 1.475353  |
| C | -1.543845 | 2.744577  | -0.142300 |



|   |           |           |           |
|---|-----------|-----------|-----------|
| C | -2.381413 | 3.945642  | 0.326398  |
| C | -2.627543 | -1.480192 | 3.302980  |
| C | -0.955038 | 3.002345  | -1.537238 |
| H | -0.349318 | 3.915927  | -1.537139 |
| H | -1.744659 | 3.127520  | -2.286736 |
| H | -0.320873 | 2.172365  | -1.867048 |
| H | -3.224787 | 4.137334  | -0.346072 |
| H | -1.766061 | 4.852265  | 0.354318  |
| H | -2.784525 | 3.776425  | 1.329757  |
| H | -2.549567 | -2.361901 | 3.950030  |
| H | -3.548580 | -0.948737 | 3.565526  |
| H | -1.779981 | -0.822650 | 3.511084  |
| H | -1.414312 | -3.047319 | 0.420159  |
| H | -1.391381 | -3.665811 | 2.081294  |
| H | -0.483629 | -2.205824 | 1.676402  |
| H | -3.801584 | 2.205701  | -1.490920 |
| H | -5.265330 | 0.219259  | -1.387097 |
| H | -4.703808 | -1.641874 | 0.154080  |
| H | 2.763642  | 0.532326  | -0.007686 |
| H | 4.902681  | 0.623462  | 1.302007  |
| H | 4.789204  | 0.668833  | 3.784529  |
| H | 0.410068  | 0.493587  | -0.088765 |
| H | 4.514263  | 0.657789  | 6.033556  |
| H | 3.549368  | 0.696735  | 8.464851  |
| H | 0.911280  | 0.669816  | 8.471251  |
| H | -3.514563 | -2.575260 | 1.703144  |
| H | -0.707919 | 2.657435  | 0.557194  |

N2Fu (2c)

E = -1037.149713

H = -1036.714441

G = -1036.795398

|   |           |           |           |
|---|-----------|-----------|-----------|
| C | -2.701416 | 1.586519  | 0.638715  |
| C | -2.003425 | 0.386508  | 0.929508  |
| C | -2.563678 | -0.876853 | 0.634129  |
| C | -3.814167 | -0.908057 | 0.000800  |
| C | -4.491908 | 0.257607  | -0.329837 |
| C | -3.934023 | 1.495194  | -0.006091 |
| N | -0.776904 | 0.510898  | 1.611924  |
| C | 0.304088  | 0.150480  | 1.044916  |
| C | 1.629281  | 0.228810  | 1.697539  |
| C | 2.755138  | -0.156827 | 0.960125  |
| C | 4.006839  | -0.082694 | 1.571422  |
| C | 4.088967  | 0.367138  | 2.879457  |
| C | 2.900310  | 0.734490  | 3.545124  |
| N | 1.700204  | 0.663709  | 2.962188  |
| C | 2.952706  | 1.213802  | 4.923351  |
| C | 3.987703  | 1.404114  | 5.807722  |
| C | 3.408177  | 1.895967  | 7.012354  |
| C | 2.065764  | 1.969277  | 6.774746  |
| O | 1.780407  | 1.560693  | 5.519360  |

|   |           |           |           |
|---|-----------|-----------|-----------|
| C | -1.903874 | -2.189614 | 1.034811  |
| C | -1.552106 | -3.055858 | -0.183737 |
| C | -2.108956 | 2.925304  | 1.055527  |
| C | -2.586073 | 4.108140  | 0.208053  |
| C | -2.777870 | -2.971653 | 2.028299  |
| C | -2.377403 | 3.181190  | 2.548925  |
| H | -1.912392 | 4.121730  | 2.866973  |
| H | -1.967137 | 2.374593  | 3.162370  |
| H | -3.455023 | 3.252727  | 2.738332  |
| H | -2.440540 | 3.927653  | -0.862654 |
| H | -2.023668 | 5.008185  | 0.479120  |
| H | -3.646315 | 4.331821  | 0.373888  |
| H | -2.259453 | -3.877553 | 2.363095  |
| H | -3.726493 | -3.279849 | 1.574523  |
| H | -3.009412 | -2.365775 | 2.909898  |
| H | -0.898198 | -2.520847 | -0.880803 |
| H | -2.450357 | -3.351629 | -0.737611 |
| H | -1.039620 | -3.972478 | 0.130616  |
| H | -4.473024 | 2.402575  | -0.261065 |
| H | -5.455199 | 0.207386  | -0.830444 |
| H | -4.263127 | -1.870074 | -0.234839 |
| H | 2.649879  | -0.503749 | -0.063943 |
| H | 4.904323  | -0.372689 | 1.032206  |
| H | 5.048454  | 0.435146  | 3.381683  |
| H | 0.316151  | -0.235078 | 0.013178  |
| H | 5.036580  | 1.217067  | 5.625866  |
| H | 3.917400  | 2.158992  | 7.928732  |
| H | 1.220852  | 2.278248  | 7.371713  |
| H | -1.021654 | 2.855279  | 0.932408  |
| H | -0.969349 | -1.958840 | 1.554063  |

N23Th (2d)

E = -972.156319

H = -971.724115

G = -971.805783

|   |          |           |           |
|---|----------|-----------|-----------|
| C | 3.597467 | -3.122709 | 0.899329  |
| C | 3.594396 | -2.285768 | -0.185635 |
| C | 3.902258 | -2.979309 | -1.409458 |
| C | 4.130760 | -4.308597 | -1.241349 |
| S | 3.975715 | -4.789384 | 0.461808  |
| C | 3.300656 | -0.845563 | -0.060604 |
| C | 3.246950 | 0.003453  | -1.182864 |
| C | 2.956499 | 1.348815  | -0.996632 |
| C | 2.726955 | 1.818273  | 0.293947  |
| C | 2.803495 | 0.906404  | 1.355758  |
| N | 3.081613 | -0.389340 | 1.178849  |
| C | 2.565539 | 1.401365  | 2.728339  |
| N | 2.700363 | 0.672601  | 3.764467  |
| C | 2.421110 | 1.200529  | 5.038104  |

|   |           |           |           |
|---|-----------|-----------|-----------|
| C | 3.458871  | 1.164323  | 6.006148  |
| C | 3.195949  | 1.686771  | 7.273656  |
| C | 1.941642  | 2.190489  | 7.613984  |
| C | 0.919777  | 2.158448  | 6.674662  |
| C | 1.126432  | 1.667054  | 5.378891  |
| C | 4.844448  | 0.590042  | 5.738208  |
| C | 4.812218  | -0.909931 | 5.405895  |
| C | -0.067481 | 1.582440  | 4.434905  |
| C | -0.634943 | 2.968037  | 4.092839  |
| C | -1.163811 | 0.668505  | 5.005511  |
| C | 5.652278  | 1.377364  | 4.695043  |
| H | 4.296973  | -1.090248 | 4.459162  |
| H | 4.298075  | -1.473850 | 6.191573  |
| H | 5.834766  | -1.297088 | 5.324654  |
| H | 5.247773  | 1.242056  | 3.688644  |
| H | 6.690820  | 1.026476  | 4.684744  |
| H | 5.660320  | 2.448797  | 4.923687  |
| H | -1.464316 | 2.879855  | 3.381689  |
| H | 0.127514  | 3.617348  | 3.649268  |
| H | -1.016249 | 3.475250  | 4.986210  |
| H | -0.767732 | -0.326115 | 5.233073  |
| H | -1.979296 | 0.553527  | 4.282148  |
| H | -1.593304 | 1.077124  | 5.927073  |
| H | 3.993732  | 1.686730  | 8.013293  |
| H | 1.760909  | 2.586562  | 8.609600  |
| H | -0.068190 | 2.518937  | 6.950803  |
| H | 2.496224  | 2.863199  | 0.481199  |
| H | 2.908226  | 2.023035  | -1.847312 |
| H | 3.423719  | -0.382510 | -2.180885 |
| H | 2.283359  | 2.463075  | 2.798915  |
| H | 3.956909  | -2.507992 | -2.383913 |
| H | 4.381619  | -5.057938 | -1.978940 |
| H | 3.398927  | -2.864383 | 1.929410  |
| H | 5.383825  | 0.692825  | 6.689774  |
| H | 0.263419  | 1.123173  | 3.499267  |

N2H (2e)

E = -808.395654

H = -808.014969

G = -808.085126

|   |           |           |           |
|---|-----------|-----------|-----------|
| C | 1.071405  | -0.803092 | 3.745743  |
| C | 1.239975  | -0.493647 | 2.388876  |
| N | 2.450074  | -0.372584 | 1.818964  |
| C | 3.517564  | -0.559571 | 2.590189  |
| C | 3.453653  | -0.871045 | 3.953422  |
| C | 2.198656  | -0.994683 | 4.541141  |
| C | 0.034075  | -0.296797 | 1.557721  |
| N | 0.078413  | -0.030704 | 0.313166  |
| C | -1.111906 | 0.167647  | -0.410007 |

|   |           |           |           |
|---|-----------|-----------|-----------|
| C | -1.338912 | -0.699541 | -1.508017 |
| C | -2.501683 | -0.533743 | -2.259900 |
| C | -3.407569 | 0.485678  | -1.970310 |
| C | -3.141589 | 1.364204  | -0.926564 |
| C | -1.998321 | 1.234994  | -0.127456 |
| C | -0.348073 | -1.812475 | -1.804589 |
| C | -0.746826 | -3.110754 | -1.083471 |
| C | -1.725167 | 2.281962  | 0.944587  |
| C | -2.789034 | 2.265614  | 2.052483  |
| C | -1.594198 | 3.686206  | 0.333291  |
| C | -0.147274 | -2.063717 | -3.302848 |
| H | 0.670019  | -2.777079 | -3.456354 |
| H | 0.106558  | -1.139660 | -3.832431 |
| H | -1.039663 | -2.490500 | -3.775465 |
| H | -0.837238 | -2.957154 | -0.003185 |
| H | 0.002641  | -3.893066 | -1.251526 |
| H | -1.711762 | -3.480728 | -1.450444 |
| H | -2.534606 | 4.019494  | -0.119581 |
| H | -0.822849 | 3.706692  | -0.442902 |
| H | -1.320931 | 4.415133  | 1.104968  |
| H | -3.779907 | 2.517268  | 1.657571  |
| H | -2.546359 | 2.997380  | 2.831758  |
| H | -2.865591 | 1.279090  | 2.522315  |
| H | -2.701663 | -1.205732 | -3.089689 |
| H | -4.308209 | 0.602890  | -2.567115 |
| H | -3.834727 | 2.177943  | -0.727228 |
| H | 4.483639  | -0.455367 | 2.098014  |
| H | 4.364640  | -1.010072 | 4.527822  |
| H | 2.097177  | -1.235497 | 5.595778  |
| H | -0.922629 | -0.412875 | 2.090594  |
| H | 0.072026  | -0.891422 | 4.163946  |
| H | 0.613000  | -1.487338 | -1.386958 |
| H | -0.761793 | 2.053021  | 1.409260  |

Yb(II)N2Ph

E = -2893.188179

H = -2892.443078

G = -2892.563197

|    |           |          |           |
|----|-----------|----------|-----------|
| Yb | 1.216775  | 2.262759 | 1.530745  |
| C  | 1.337536  | 5.077047 | 1.432113  |
| C  | 1.207564  | 4.672163 | 2.795008  |
| C  | -0.087997 | 4.124200 | 2.950997  |
| C  | -0.749808 | 4.100859 | 1.702385  |
| C  | 0.120638  | 4.699725 | 0.744528  |
| C  | 2.345266  | 5.779601 | 0.726472  |
| C  | 2.159368  | 6.076956 | -0.609077 |
| C  | 0.981025  | 5.675484 | -1.292930 |
| C  | -0.024747 | 4.994044 | -0.635834 |
| C  | 3.237045  | 0.419678 | 0.686685  |

|   |           |           |           |
|---|-----------|-----------|-----------|
| C | 3.065400  | -0.984659 | 0.689309  |
| C | 2.583883  | -1.616256 | -0.443568 |
| C | 2.255159  | -0.875756 | -1.607863 |
| C | 2.386335  | 0.500140  | -1.636179 |
| C | 2.875149  | 1.179830  | -0.493473 |
| C | 3.204595  | 2.546023  | -0.247019 |
| C | 3.810201  | 2.610954  | 1.027656  |
| C | 3.796330  | 1.334936  | 1.630080  |
| C | -3.576756 | 1.342062  | -1.174790 |
| C | -4.631997 | 1.706370  | -0.347011 |
| C | -4.444577 | 1.732791  | 1.030368  |
| C | -3.213118 | 1.407075  | 1.608568  |
| C | -2.150337 | 1.046491  | 0.744109  |
| C | -2.321755 | 1.007800  | -0.654466 |
| N | -0.868039 | 0.751529  | 1.325293  |
| C | -0.756285 | -0.397457 | 1.892163  |
| C | 0.336183  | -0.752562 | 2.799794  |
| C | 0.469127  | -2.092167 | 3.181499  |
| C | 1.428464  | -2.426364 | 4.127213  |
| C | 2.180647  | -1.402631 | 4.693041  |
| C | 1.982939  | -0.076259 | 4.277020  |
| N | 1.096365  | 0.244618  | 3.311633  |
| C | 2.708756  | 1.015342  | 4.967354  |
| C | 4.043751  | 0.855364  | 5.371039  |
| C | 4.697629  | 1.866306  | 6.070279  |
| C | 4.023190  | 3.046104  | 6.391860  |
| C | 2.694406  | 3.210805  | 6.001983  |
| C | 2.043390  | 2.205322  | 5.289155  |
| C | -3.074901 | 1.435413  | 3.126570  |
| C | -3.662992 | 2.703329  | 3.764139  |
| C | -1.225254 | 0.518979  | -1.583178 |
| C | -1.066659 | 1.383305  | -2.839492 |
| C | -3.716965 | 0.188336  | 3.761454  |
| C | -1.474493 | -0.950532 | -1.966512 |
| H | -4.793971 | 0.162595  | 3.559846  |
| H | -3.577332 | 0.192950  | 4.848527  |
| H | -3.290426 | -0.739902 | 3.368171  |
| H | -3.246474 | 3.612958  | 3.323382  |
| H | -3.442052 | 2.715296  | 4.837270  |
| H | -4.752628 | 2.746024  | 3.660833  |
| H | -2.423202 | -1.056461 | -2.506006 |
| H | -1.520997 | -1.594379 | -1.081923 |
| H | -0.670076 | -1.320467 | -2.609880 |
| H | -0.896400 | 2.434016  | -2.586289 |
| H | -1.946013 | 1.328357  | -3.490852 |
| H | -0.210509 | 1.034176  | -3.425339 |
| H | -5.272552 | 2.016583  | 1.673747  |
| H | -5.598065 | 1.964165  | -0.772402 |
| H | -3.731239 | 1.305849  | -2.249279 |
| H | -0.174063 | -2.845268 | 2.736556  |

|   |           |           |           |
|---|-----------|-----------|-----------|
| H | 1.566246  | -3.455997 | 4.443802  |
| H | 2.886494  | -1.610890 | 5.489827  |
| H | -1.541028 | -1.153894 | 1.779315  |
| H | 2.160386  | 4.122430  | 6.255008  |
| H | 4.532156  | 3.832349  | 6.942371  |
| H | 5.736827  | 1.735846  | 6.358936  |
| H | 4.584431  | -0.050575 | 5.109454  |
| H | 1.004925  | 2.326677  | 4.998767  |
| H | 3.249751  | 6.099811  | 1.239369  |
| H | 2.924393  | 6.628576  | -1.149879 |
| H | 0.866769  | 5.924728  | -2.344976 |
| H | -0.940006 | 4.721866  | -1.157288 |
| H | -1.761281 | 3.767242  | 1.512374  |
| H | -0.518930 | 3.786619  | 3.888411  |
| H | 1.930138  | 4.853707  | 3.581166  |
| H | 1.912579  | -1.405069 | -2.493574 |
| H | 2.480001  | -2.698564 | -0.455222 |
| H | 3.352202  | -1.569078 | 1.561433  |
| H | 2.155974  | 1.058832  | -2.540510 |
| H | 3.084873  | 3.372902  | -0.936502 |
| H | 4.200827  | 3.513790  | 1.483944  |
| H | 4.233399  | 1.081500  | 2.586826  |
| H | -2.006573 | 1.424312  | 3.368870  |
| H | -0.272561 | 0.550696  | -1.042220 |

Yb(III)N2Ph

E = -2893.173584

H = -2892.428757

G = -2892.546762

|    |           |           |           |
|----|-----------|-----------|-----------|
| Yb | 1.168836  | 2.020217  | 1.519516  |
| C  | 1.528684  | 4.795065  | 1.554435  |
| C  | 1.207100  | 4.300575  | 2.858267  |
| C  | -0.122975 | 3.827843  | 2.818040  |
| C  | -0.611495 | 3.899030  | 1.491151  |
| C  | 0.402519  | 4.518342  | 0.693474  |
| C  | 2.641320  | 5.510564  | 1.053312  |
| C  | 2.640953  | 5.915251  | -0.267304 |
| C  | 1.556870  | 5.602732  | -1.128973 |
| C  | 0.452835  | 4.912105  | -0.668045 |
| C  | 2.910180  | 0.140658  | 0.340452  |
| C  | 2.572085  | -1.182386 | -0.031797 |
| C  | 2.193648  | -1.435258 | -1.335438 |
| C  | 2.110248  | -0.389130 | -2.291505 |
| C  | 2.374390  | 0.921101  | -1.945684 |
| C  | 2.785219  | 1.212501  | -0.620882 |
| C  | 3.268728  | 2.409638  | -0.003990 |
| C  | 3.744909  | 2.059017  | 1.286397  |
| C  | 3.476184  | 0.693032  | 1.530811  |
| C  | 0.397313  | -0.659586 | 2.911598  |

|   |           |           |           |
|---|-----------|-----------|-----------|
| C | 0.627083  | -1.949920 | 3.462332  |
| C | 1.502390  | -2.102268 | 4.508222  |
| C | 2.138776  | -0.955786 | 5.035238  |
| C | 1.888454  | 0.284186  | 4.458469  |
| N | 1.075661  | 0.452767  | 3.388113  |
| C | -0.569469 | -0.472362 | 1.896246  |
| N | -0.768392 | 0.712101  | 1.291261  |
| C | -2.080277 | 0.917346  | 0.761256  |
| C | -3.148528 | 1.166707  | 1.666575  |
| C | -4.426200 | 1.415119  | 1.155971  |
| C | -4.672509 | 1.428511  | -0.212355 |
| C | -3.626105 | 1.172283  | -1.089074 |
| C | -2.329482 | 0.907521  | -0.630771 |
| C | 2.516695  | 1.485857  | 5.076521  |
| C | 3.910087  | 1.619187  | 5.142177  |
| C | 4.488413  | 2.704079  | 5.802024  |
| C | 3.680860  | 3.657908  | 6.422800  |
| C | 2.291809  | 3.524588  | 6.376187  |
| C | 1.714293  | 2.449596  | 5.701770  |
| C | -2.957224 | 1.177755  | 3.177301  |
| C | -3.548310 | 2.434206  | 3.836152  |
| C | -1.264036 | 0.543362  | -1.648931 |
| C | -1.130246 | 1.586920  | -2.764926 |
| C | -3.548343 | -0.085009 | 3.824309  |
| C | -1.550448 | -0.846292 | -2.240912 |
| H | -4.630419 | -0.141990 | 3.657045  |
| H | -3.375424 | -0.081169 | 4.906875  |
| H | -3.099943 | -0.994439 | 3.412766  |
| H | -3.171675 | 3.351333  | 3.372668  |
| H | -3.291168 | 2.458524  | 4.901598  |
| H | -4.641655 | 2.454424  | 3.768476  |
| H | -2.511531 | -0.857463 | -2.768237 |
| H | -1.590572 | -1.610650 | -1.458263 |
| H | -0.769871 | -1.130347 | -2.954444 |
| H | -0.908877 | 2.579304  | -2.360572 |
| H | -2.045486 | 1.666143  | -3.362188 |
| H | -0.318011 | 1.310928  | -3.444903 |
| H | -5.243867 | 1.607648  | 1.846086  |
| H | -5.671275 | 1.629874  | -0.590548 |
| H | -3.820966 | 1.162753  | -2.158425 |
| H | 0.093594  | -2.798829 | 3.044024  |
| H | 1.686412  | -3.081420 | 4.941465  |
| H | 2.789138  | -1.019280 | 5.900734  |
| H | -1.212159 | -1.320298 | 1.651339  |
| H | 1.656904  | 4.256797  | 6.867906  |
| H | 4.131243  | 4.497317  | 6.945573  |
| H | 5.570399  | 2.799780  | 5.836287  |
| H | 4.542038  | 0.869957  | 4.672514  |
| H | 0.634098  | 2.338368  | 5.674979  |
| H | 3.475264  | 5.754573  | 1.707164  |

|   |           |           |           |
|---|-----------|-----------|-----------|
| H | 3.481389  | 6.483130  | -0.657933 |
| H | 1.590372  | 5.933679  | -2.163668 |
| H | -0.389330 | 4.715573  | -1.326472 |
| H | -1.593980 | 3.595404  | 1.153242  |
| H | -0.668796 | 3.417544  | 3.658949  |
| H | 1.829622  | 4.383890  | 3.739502  |
| H | 1.832563  | -0.629732 | -3.314370 |
| H | 1.964327  | -2.452693 | -1.641083 |
| H | 2.656027  | -1.991829 | 0.688977  |
| H | 2.312706  | 1.715376  | -2.685360 |
| H | 3.347547  | 3.380778  | -0.474922 |
| H | 4.209859  | 2.743315  | 1.987957  |
| H | 3.737939  | 0.137019  | 2.421195  |
| H | -1.881763 | 1.178161  | 3.375049  |
| H | -0.301616 | 0.482074  | -1.129676 |

Yb(II)N22Th

E = -2825.974563

H = -2825.263488

G = -2825.381245

|    |           |           |          |
|----|-----------|-----------|----------|
| Yb | -0.030458 | 2.151672  | 3.377803 |
| C  | -0.784623 | 3.675077  | 5.448966 |
| C  | 0.250393  | 2.911559  | 6.026360 |
| C  | -0.257256 | 1.595300  | 6.233823 |
| C  | -1.607700 | 1.553066  | 5.707701 |
| C  | -1.909143 | 2.853390  | 5.198846 |
| C  | -2.366920 | 0.365202  | 5.850518 |
| C  | -1.817895 | -0.726621 | 6.497014 |
| C  | -0.502149 | -0.676565 | 7.026967 |
| C  | 0.268974  | 0.462942  | 6.899661 |
| C  | 1.018234  | 2.948455  | 0.955987 |
| C  | 1.590882  | 3.955042  | 1.789868 |
| C  | 0.510270  | 4.755627  | 2.318504 |
| C  | -0.709784 | 4.242554  | 1.777595 |
| C  | -0.376487 | 3.180668  | 0.913831 |
| C  | 0.806051  | 5.869177  | 3.141170 |
| C  | 2.123070  | 6.186981  | 3.415664 |
| C  | 3.184920  | 5.413340  | 2.879716 |
| C  | 2.930915  | 4.313378  | 2.081296 |
| N  | -1.481987 | 0.350899  | 2.071322 |
| C  | -1.252162 | -0.872750 | 2.392506 |
| C  | -0.140972 | -1.314931 | 3.237104 |
| C  | -0.057783 | -2.679315 | 3.535184 |
| C  | 1.052562  | -3.151481 | 4.225171 |
| C  | 2.037868  | -2.246731 | 4.589257 |
| C  | 1.873164  | -0.885200 | 4.283234 |
| N  | 0.800302  | -0.419931 | 3.607951 |
| C  | 2.894412  | 0.074808  | 4.675841 |
| S  | 2.975153  | 1.631457  | 3.814593 |



|   |           |           |           |
|---|-----------|-----------|-----------|
| C | 4.263132  | 2.178379  | 4.895646  |
| C | 4.610622  | 1.211131  | 5.791192  |
| C | 3.833022  | 0.019939  | 5.672954  |
| C | -2.450692 | 0.511504  | 1.017413  |
| C | -3.752286 | 0.964825  | 1.308454  |
| C | -4.662028 | 1.097145  | 0.254020  |
| C | -4.301352 | 0.803839  | -1.055966 |
| C | -3.007363 | 0.373744  | -1.327498 |
| C | -2.058146 | 0.214545  | -0.311238 |
| C | -4.202143 | 1.267312  | 2.725696  |
| C | -4.844991 | 2.653148  | 2.848876  |
| C | -0.657739 | -0.259267 | -0.678503 |
| C | -0.053075 | 0.517750  | -1.854913 |
| C | -5.151317 | 0.175350  | 3.241565  |
| C | -0.642740 | -1.766155 | -0.989243 |
| H | -5.450857 | 0.376502  | 4.276567  |
| H | -4.678657 | -0.812248 | 3.210692  |
| H | -6.063117 | 0.126763  | 2.635481  |
| H | -4.165723 | 3.437585  | 2.501593  |
| H | -5.101101 | 2.858927  | 3.893912  |
| H | -5.769075 | 2.726579  | 2.265336  |
| H | -1.244632 | -1.982916 | -1.879355 |
| H | -1.051857 | -2.362660 | -0.167547 |
| H | 0.379707  | -2.110182 | -1.183289 |
| H | -0.056413 | 1.596477  | -1.674663 |
| H | -0.591424 | 0.328183  | -2.789755 |
| H | 0.985142  | 0.204919  | -2.011174 |
| H | -5.673431 | 1.433042  | 0.465990  |
| H | -5.023366 | 0.912772  | -1.860561 |
| H | -2.723386 | 0.157005  | -2.353193 |
| H | -0.847787 | -3.350313 | 3.212802  |
| H | 1.155609  | -4.207018 | 4.458569  |
| H | 2.939808  | -2.576309 | 5.092959  |
| H | -1.867275 | -1.678371 | 1.977260  |
| H | 3.940110  | -0.827604 | 6.341227  |
| H | 5.390959  | 1.348645  | 6.531676  |
| H | 4.664546  | 3.171418  | 4.751899  |
| H | -0.718354 | 4.731800  | 5.219747  |
| H | -2.864907 | 3.188844  | 4.816032  |
| H | 1.213054  | 3.285601  | 6.355256  |
| H | 1.264947  | 0.507596  | 7.333928  |
| H | -3.393709 | 0.322565  | 5.496502  |
| H | -2.412051 | -1.627703 | 6.630877  |
| H | -0.109187 | -1.540483 | 7.557889  |
| H | 0.000904  | 6.489730  | 3.529473  |
| H | -1.694898 | 4.673827  | 1.910797  |
| H | -1.083660 | 2.633944  | 0.303160  |
| H | 1.569745  | 2.233535  | 0.356432  |
| H | 3.753165  | 3.752659  | 1.640348  |
| H | 4.212001  | 5.712199  | 3.078307  |

|   |           |           |          |
|---|-----------|-----------|----------|
| H | 2.352812  | 7.052570  | 4.031878 |
| H | -3.311730 | 1.258007  | 3.359707 |
| H | -0.007589 | -0.088210 | 0.184195 |

Yb(III)N22Th

E = -2825.956970

H = -2825.246735

G = -2825.365053

|    |           |           |           |
|----|-----------|-----------|-----------|
| Yb | -0.158734 | 1.898472  | 3.320536  |
| C  | -1.437811 | 3.243849  | 5.122331  |
| C  | -0.119263 | 3.121003  | 5.632296  |
| C  | 0.011923  | 1.799841  | 6.166353  |
| C  | -1.215593 | 1.095909  | 5.898305  |
| C  | -2.089124 | 1.997915  | 5.211243  |
| C  | -1.395645 | -0.221063 | 6.375452  |
| C  | -0.391392 | -0.803920 | 7.124402  |
| C  | 0.814132  | -0.109881 | 7.396750  |
| C  | 1.030129  | 1.167415  | 6.918284  |
| C  | 1.128659  | 2.975703  | 1.272399  |
| C  | 1.426703  | 3.996638  | 2.233633  |
| C  | 0.189152  | 4.649411  | 2.574569  |
| C  | -0.853128 | 4.019084  | 1.820465  |
| C  | -0.250453 | 3.066073  | 0.977355  |
| C  | 0.196831  | 5.759793  | 3.450729  |
| C  | 1.398163  | 6.207845  | 3.964596  |
| C  | 2.618908  | 5.568414  | 3.628608  |
| C  | 2.641986  | 4.479179  | 2.779040  |
| N  | -1.622172 | 0.521210  | 2.047277  |
| C  | -1.563056 | -0.764310 | 2.435846  |
| C  | -0.504661 | -1.304384 | 3.197626  |
| C  | -0.516948 | -2.687022 | 3.516710  |
| C  | 0.577723  | -3.266351 | 4.110980  |
| C  | 1.693546  | -2.458580 | 4.397490  |
| C  | 1.633988  | -1.094433 | 4.128076  |
| N  | 0.558237  | -0.490344 | 3.550706  |
| C  | 2.774694  | -0.256288 | 4.470877  |
| S  | 2.868698  | 1.360514  | 3.739500  |
| C  | 4.298198  | 1.751914  | 4.713195  |
| C  | 4.679758  | 0.680787  | 5.464521  |
| C  | 3.817343  | -0.450330 | 5.338258  |
| C  | -2.441017 | 0.718450  | 0.890132  |
| C  | -3.659250 | 1.435923  | 0.968063  |
| C  | -4.430618 | 1.593853  | -0.187206 |
| C  | -4.026652 | 1.062299  | -1.407755 |
| C  | -2.822943 | 0.372371  | -1.482164 |
| C  | -2.008050 | 0.193776  | -0.357561 |
| C  | -4.162414 | 1.970051  | 2.295625  |
| C  | -4.946645 | 3.282558  | 2.187535  |
| C  | -0.677774 | -0.531757 | -0.533024 |

|   |           |           |           |
|---|-----------|-----------|-----------|
| C | 0.186167  | 0.097854  | -1.639085 |
| C | -4.997681 | 0.903381  | 3.023055  |
| C | -0.879416 | -2.029366 | -0.809616 |
| H | -5.346535 | 1.271468  | 3.995631  |
| H | -4.417346 | -0.009158 | 3.190717  |
| H | -5.880283 | 0.636093  | 2.430002  |
| H | -4.400020 | 4.036589  | 1.611474  |
| H | -5.136334 | 3.689093  | 3.187082  |
| H | -5.923183 | 3.140896  | 1.710992  |
| H | -1.430617 | -2.186401 | -1.744105 |
| H | -1.441846 | -2.515434 | -0.006587 |
| H | 0.087348  | -2.537723 | -0.900788 |
| H | 0.341642  | 1.168310  | -1.472902 |
| H | -0.268491 | -0.021564 | -2.628676 |
| H | 1.168720  | -0.386652 | -1.671198 |
| H | -5.368158 | 2.139344  | -0.130872 |
| H | -4.642109 | 1.192903  | -2.293869 |
| H | -2.501396 | -0.032984 | -2.438170 |
| H | -1.392499 | -3.273678 | 3.253999  |
| H | 0.594028  | -4.328605 | 4.336796  |
| H | 2.595756  | -2.885106 | 4.819976  |
| H | -2.323159 | -1.463096 | 2.082158  |
| H | 3.942175  | -1.357566 | 5.917678  |
| H | 5.551517  | 0.700987  | 6.109837  |
| H | 4.753303  | 2.725646  | 4.605802  |
| H | -1.867138 | 4.149820  | 4.712582  |
| H | -3.114043 | 1.786732  | 4.939606  |
| H | 0.606142  | 3.921578  | 5.710852  |
| H | 1.955517  | 1.692783  | 7.139920  |
| H | -2.322138 | -0.754235 | 6.178373  |
| H | -0.525093 | -1.808516 | 7.516706  |
| H | 1.580375  | -0.595667 | 7.995413  |
| H | -0.730519 | 6.273453  | 3.693840  |
| H | -1.893616 | 4.318352  | 1.797193  |
| H | -0.771979 | 2.478234  | 0.234817  |
| H | 1.851441  | 2.354527  | 0.757277  |
| H | 3.588379  | 4.031148  | 2.483511  |
| H | 3.550299  | 5.962600  | 4.027438  |
| H | 1.415246  | 7.072899  | 4.622349  |
| H | -3.276676 | 2.165730  | 2.908107  |
| H | -0.120128 | -0.438325 | 0.403494  |

Yb(II)N2Fu

E = -2890.976343

H = -2890.262361

G = -2890.378190

|   |          |          |          |
|---|----------|----------|----------|
| C | 3.278416 | 3.895338 | 2.344304 |
| C | 1.937115 | 3.643800 | 1.969395 |
| C | 0.901537 | 4.581918 | 2.352323 |

|    |           |           |           |
|----|-----------|-----------|-----------|
| C  | 1.240931  | 5.709824  | 3.137170  |
| C  | 2.560733  | 5.925276  | 3.489735  |
| C  | 3.580286  | 5.026732  | 3.081787  |
| C  | 1.333373  | 2.644946  | 1.146059  |
| C  | -0.020035 | 3.014081  | 0.964729  |
| C  | -0.316640 | 4.157645  | 1.735648  |
| Yb | -0.024813 | 2.114514  | 3.480861  |
| C  | -0.278326 | 1.839119  | 6.289960  |
| C  | -1.607928 | 1.626871  | 5.750448  |
| C  | -2.028909 | 2.853477  | 5.149970  |
| C  | -0.997119 | 3.798000  | 5.350557  |
| C  | 0.094474  | 3.185167  | 6.001640  |
| C  | 0.361131  | 0.794780  | 7.000060  |
| C  | -0.285315 | -0.416009 | 7.166524  |
| C  | -1.580977 | -0.629679 | 6.628650  |
| C  | -2.236026 | 0.369518  | 5.932194  |
| N  | -1.584262 | 0.373580  | 2.031991  |
| C  | -1.301995 | -0.855269 | 2.278166  |
| C  | -0.182991 | -1.292131 | 3.108294  |
| C  | -0.016504 | -2.666076 | 3.295692  |
| C  | 1.094794  | -3.119606 | 4.001368  |
| C  | 1.996548  | -2.185890 | 4.481382  |
| C  | 1.758756  | -0.817190 | 4.259364  |
| N  | 0.684526  | -0.367282 | 3.580188  |
| C  | 2.697347  | 0.160972  | 4.766448  |
| C  | 3.861345  | 0.072001  | 5.487155  |
| C  | 4.298732  | 1.406093  | 5.721296  |
| C  | 3.381192  | 2.221781  | 5.129215  |
| O  | 2.408767  | 1.476495  | 4.539417  |
| C  | -2.540182 | 0.579597  | 0.980136  |
| C  | -3.841687 | 1.018191  | 1.299146  |
| C  | -4.755291 | 1.207327  | 0.257212  |
| C  | -4.400945 | 0.979977  | -1.066963 |
| C  | -3.115308 | 0.545318  | -1.364768 |
| C  | -2.159343 | 0.332372  | -0.365069 |
| C  | -4.291876 | 1.185779  | 2.741350  |
| C  | -5.105043 | -0.040616 | 3.195589  |
| C  | -0.776283 | -0.169080 | -0.771613 |
| C  | -0.812652 | -1.660672 | -1.152507 |
| C  | -0.154545 | 0.639334  | -1.919990 |
| C  | -5.081544 | 2.478386  | 2.980796  |
| H  | -5.409080 | 0.059875  | 4.243801  |
| H  | -4.523890 | -0.963823 | 3.097317  |
| H  | -6.012655 | -0.152937 | 2.591451  |
| H  | -4.524491 | 3.356000  | 2.637491  |
| H  | -5.292481 | 2.601347  | 4.048417  |
| H  | -6.047171 | 2.469067  | 2.463919  |
| H  | -1.486301 | -1.827767 | -2.000762 |
| H  | -1.164522 | -2.289447 | -0.328676 |
| H  | 0.185459  | -2.010115 | -1.440728 |

|   |           |           |           |
|---|-----------|-----------|-----------|
| H | -0.168648 | 1.713561  | -1.714593 |
| H | -0.670660 | 0.468011  | -2.870617 |
| H | 0.887645  | 0.334648  | -2.060881 |
| H | -5.767024 | 1.525457  | 0.490297  |
| H | -5.123768 | 1.135785  | -1.863319 |
| H | -2.843942 | 0.368897  | -2.401513 |
| H | -0.746264 | -3.358000 | 2.886667  |
| H | 1.254964  | -4.180613 | 4.167077  |
| H | 2.879056  | -2.498124 | 5.028345  |
| H | -1.858888 | -1.662404 | 1.789588  |
| H | 4.345139  | -0.833889 | 5.822948  |
| H | 5.179129  | 1.723013  | 6.261780  |
| H | 3.289336  | 3.290318  | 5.013882  |
| H | -1.032995 | 4.835988  | 5.039666  |
| H | -3.003308 | 3.066845  | 4.730834  |
| H | 1.007311  | 3.680388  | 6.309460  |
| H | 1.344231  | 0.958204  | 7.437178  |
| H | -3.243325 | 0.200150  | 5.557232  |
| H | -2.072310 | -1.586871 | 6.786871  |
| H | 0.194847  | -1.211890 | 7.730980  |
| H | 0.473611  | 6.424715  | 3.426521  |
| H | -1.263204 | 4.685070  | 1.760311  |
| H | -0.735541 | 2.494565  | 0.342610  |
| H | 1.850227  | 1.835477  | 0.642914  |
| H | 4.069513  | 3.219252  | 2.025551  |
| H | 4.614183  | 5.240961  | 3.343814  |
| H | 2.827660  | 6.806180  | 4.068368  |
| H | -3.388228 | 1.226051  | 3.360939  |
| H | -0.114493 | -0.053557 | 0.094645  |

Yb(III)N2Fu

E = -2890.959998

H = -2890.245011

G = -2890.357335

|    |           |          |          |
|----|-----------|----------|----------|
| C  | 2.706213  | 4.511477 | 2.940196 |
| C  | 1.568801  | 3.898804 | 2.358769 |
| C  | 0.268392  | 4.493189 | 2.550255 |
| C  | 0.137332  | 5.649129 | 3.355572 |
| C  | 1.262360  | 6.206601 | 3.930820 |
| C  | 2.547052  | 5.645073 | 3.714717 |
| C  | 1.414664  | 2.803603 | 1.446499 |
| C  | 0.065970  | 2.796903 | 1.023164 |
| C  | -0.663938 | 3.763473 | 1.744559 |
| Yb | -0.045652 | 1.785197 | 3.412128 |
| C  | 0.090056  | 1.677053 | 6.244888 |
| C  | -1.150924 | 1.011921 | 5.940280 |
| C  | -1.991769 | 1.953644 | 5.266420 |
| C  | -1.302325 | 3.179886 | 5.204069 |

|   |           |           |           |
|---|-----------|-----------|-----------|
| C | 0.004998  | 3.011137  | 5.730472  |
| C | 1.079449  | 0.993863  | 6.992272  |
| C | 0.832471  | -0.298231 | 7.411976  |
| C | -0.383814 | -0.955996 | 7.095889  |
| C | -1.366586 | -0.319233 | 6.364160  |
| N | -1.643276 | 0.513293  | 2.106720  |
| C | -1.600707 | -0.792612 | 2.422167  |
| C | -0.519908 | -1.367328 | 3.121743  |
| C | -0.443908 | -2.765443 | 3.347167  |
| C | 0.705899  | -3.315752 | 3.863732  |
| C | 1.789037  | -2.470282 | 4.180011  |
| C | 1.641337  | -1.101217 | 3.992205  |
| N | 0.522608  | -0.533682 | 3.481439  |
| C | 2.706405  | -0.185121 | 4.359303  |
| C | 3.962054  | -0.330845 | 4.881697  |
| C | 4.477703  | 0.982563  | 5.089175  |
| C | 3.511255  | 1.847643  | 4.681893  |
| O | 2.429964  | 1.152260  | 4.215880  |
| C | -2.463978 | 0.783273  | 0.966179  |
| C | -3.621011 | 1.594567  | 1.069072  |
| C | -4.395075 | 1.827243  | -0.071485 |
| C | -4.057545 | 1.278742  | -1.303768 |
| C | -2.914268 | 0.496372  | -1.404151 |
| C | -2.095769 | 0.241333  | -0.297593 |
| C | -4.075714 | 2.136250  | 2.410970  |
| C | -4.952283 | 1.102243  | 3.136577  |
| C | -0.827648 | -0.580200 | -0.515229 |
| C | -1.152892 | -2.054521 | -0.805255 |
| C | 0.053871  | -0.017140 | -1.642705 |
| C | -4.792945 | 3.487924  | 2.333049  |
| H | -5.266285 | 1.472083  | 4.120394  |
| H | -4.416553 | 0.158851  | 3.279670  |
| H | -5.856878 | 0.889683  | 2.554887  |
| H | -4.224384 | 4.218453  | 1.747773  |
| H | -4.934898 | 3.895456  | 3.340129  |
| H | -5.788346 | 3.402412  | 1.882396  |
| H | -1.744586 | -2.148393 | -1.723560 |
| H | -1.728602 | -2.512254 | 0.004487  |
| H | -0.232912 | -2.635060 | -0.938415 |
| H | 0.301860  | 1.036882  | -1.485425 |
| H | -0.432171 | -0.099233 | -2.621095 |
| H | 0.992931  | -0.579646 | -1.699290 |
| H | -5.287896 | 2.440470  | 0.008911  |
| H | -4.676167 | 1.464531  | -2.177598 |
| H | -2.640818 | 0.081196  | -2.371078 |
| H | -1.293254 | -3.385663 | 3.075590  |
| H | 0.785863  | -4.387548 | 4.019474  |
| H | 2.711161  | -2.869428 | 4.586076  |
| H | -2.372603 | -1.465362 | 2.041788  |
| H | 4.456039  | -1.264796 | 5.107013  |

|   |           |           |          |
|---|-----------|-----------|----------|
| H | 5.442166  | 1.251638  | 5.496220 |
| H | 3.423374  | 2.921365  | 4.650968 |
| H | -1.696751 | 4.105482  | 4.803563 |
| H | -3.016946 | 1.774511  | 4.976837 |
| H | 0.745264  | 3.795495  | 5.840702 |
| H | 2.011548  | 1.489247  | 7.252425 |
| H | -2.302186 | -0.822362 | 6.133911 |
| H | -0.541881 | -1.973899 | 7.441925 |
| H | 1.581078  | -0.823302 | 7.999743 |
| H | -0.835823 | 6.116350  | 3.488980 |
| H | -1.713685 | 3.993380  | 1.612303 |
| H | -0.358446 | 2.126061  | 0.290063 |
| H | 2.213014  | 2.191594  | 1.042989 |
| H | 3.700102  | 4.124258  | 2.727313 |
| H | 3.418958  | 6.135638  | 4.140343 |
| H | 1.170853  | 7.106517  | 4.533306 |
| H | -3.170866 | 2.278130  | 3.008599 |
| H | -0.241067 | -0.539684 | 0.406148 |

Yb(II)N23Th

E = -2825.971355

H = -2825.260399

G = -2825.378914

|    |           |          |          |
|----|-----------|----------|----------|
| C  | -3.112163 | 2.736524 | 2.745890 |
| C  | -3.066588 | 3.979959 | 3.462277 |
| C  | -4.209502 | 4.205852 | 4.187782 |
| S  | -5.374443 | 2.892619 | 4.028928 |
| C  | -4.265418 | 2.042247 | 2.937841 |
| C  | -1.934934 | 4.920042 | 3.446505 |
| N  | -0.687204 | 4.433428 | 3.279644 |
| C  | 0.335700  | 5.320261 | 3.278436 |
| C  | 0.158884  | 6.694935 | 3.462583 |
| C  | -1.128140 | 7.192075 | 3.623103 |
| C  | -2.185047 | 6.295748 | 3.594308 |
| Yb | 0.133664  | 1.940367 | 3.498293 |
| C  | 0.936589  | 1.082331 | 5.915405 |
| C  | 0.656099  | 2.446135 | 6.240653 |
| C  | -0.778472 | 2.631660 | 6.143364 |
| C  | -1.350854 | 1.387012 | 5.745253 |
| C  | -0.302462 | 0.444859 | 5.666454 |
| C  | 1.464846  | 3.525749 | 6.674926 |
| C  | 0.879594  | 4.731920 | 7.010807 |
| C  | -0.527453 | 4.904096 | 6.938304 |
| C  | -1.345568 | 3.874634 | 6.515791 |
| C  | 1.688691  | 4.857980 | 2.964761 |
| N  | 2.030878  | 3.626453 | 2.825436 |
| C  | 3.308193  | 3.405127 | 2.216454 |
| C  | 4.334748  | 2.766072 | 2.946148 |
| C  | 5.554159  | 2.523042 | 2.308167 |

|   |           |           |           |
|---|-----------|-----------|-----------|
| C | 5.766643  | 2.889146  | 0.984148  |
| C | 4.746679  | 3.513578  | 0.277319  |
| C | 3.504424  | 3.785765  | 0.862024  |
| C | 4.185311  | 2.437899  | 4.421097  |
| C | 4.926164  | 3.486938  | 5.267915  |
| C | 2.435972  | 4.455807  | 0.000676  |
| C | 2.237022  | 3.754447  | -1.353921 |
| C | 1.368450  | -0.023358 | 2.071328  |
| C | 1.128473  | 1.031033  | 1.167293  |
| C | -0.257561 | 1.134242  | 0.898864  |
| C | -0.898888 | 0.047642  | 1.573143  |
| C | 0.116797  | -0.670600 | 2.313185  |
| C | -0.235908 | -1.842962 | 3.023552  |
| C | -1.541057 | -2.295626 | 2.989211  |
| C | -2.533903 | -1.602466 | 2.250227  |
| C | -2.225112 | -0.449558 | 1.553507  |
| C | 4.663162  | 1.024498  | 4.777029  |
| C | 2.757245  | 5.941952  | -0.234190 |
| H | 4.529959  | 4.493675  | 5.099645  |
| H | 4.835689  | 3.260134  | 6.336111  |
| H | 5.993590  | 3.501439  | 5.018984  |
| H | 4.158164  | 0.265599  | 4.171986  |
| H | 4.453603  | 0.812972  | 5.830989  |
| H | 5.743011  | 0.907038  | 4.633998  |
| H | 3.702380  | 6.053015  | -0.777593 |
| H | 2.854194  | 6.499697  | 0.702926  |
| H | 1.970126  | 6.416437  | -0.831249 |
| H | 2.055487  | 2.682528  | -1.238579 |
| H | 3.106086  | 3.880360  | -2.008515 |
| H | 1.375332  | 4.188917  | -1.872402 |
| H | 6.356762  | 2.046985  | 2.864139  |
| H | 6.721624  | 2.689384  | 0.505976  |
| H | 4.914000  | 3.792919  | -0.759131 |
| H | 1.021897  | 7.353408  | 3.457675  |
| H | -1.304442 | 8.256462  | 3.746648  |
| H | -3.209761 | 6.644590  | 3.658148  |
| H | 2.415219  | 5.655595  | 2.776012  |
| H | -0.430455 | -0.604518 | 5.428699  |
| H | 1.901232  | 0.592715  | 5.977232  |
| H | -2.407304 | 1.173561  | 5.633215  |
| H | -2.425188 | 4.001135  | 6.498897  |
| H | 2.537082  | 3.393807  | 6.789919  |
| H | 1.499427  | 5.550901  | 7.368298  |
| H | -0.964428 | 5.851563  | 7.244941  |
| H | 0.524464  | -2.398216 | 3.569013  |
| H | 2.339382  | -0.364417 | 2.410317  |
| H | 1.898618  | 1.662064  | 0.744917  |
| H | -0.718630 | 1.804456  | 0.181181  |
| H | -2.980741 | 0.044287  | 0.944570  |
| H | -3.544989 | -2.001419 | 2.216660  |



|   |           |           |          |
|---|-----------|-----------|----------|
| H | -1.811698 | -3.205214 | 3.519448 |
| H | -4.439625 | 5.023963  | 4.855757 |
| H | -4.561094 | 1.086096  | 2.532490 |
| H | -2.329615 | 2.393087  | 2.075378 |
| H | 3.120110  | 2.499585  | 4.670773 |
| H | 1.478588  | 4.396696  | 0.528515 |

Yb(III)N23Th

E = -2825.957987

H = -2825.247424

G = -2825.364350

|    |           |           |           |
|----|-----------|-----------|-----------|
| C  | -3.270941 | 3.270349  | 1.791141  |
| C  | -3.103790 | 4.015356  | 3.008418  |
| C  | -4.166040 | 3.866164  | 3.858413  |
| S  | -5.407509 | 2.789642  | 3.199609  |
| C  | -4.436470 | 2.570742  | 1.731767  |
| C  | -1.957950 | 4.914953  | 3.273639  |
| N  | -0.702710 | 4.406099  | 3.173492  |
| C  | 0.358617  | 5.278505  | 3.360150  |
| C  | 0.141119  | 6.639738  | 3.699286  |
| C  | -1.137137 | 7.125008  | 3.808009  |
| C  | -2.216824 | 6.245875  | 3.577780  |
| Yb | 0.135251  | 2.141945  | 3.404118  |
| C  | 0.642634  | 1.102686  | 5.722226  |
| C  | 0.583342  | 2.474885  | 6.140792  |
| C  | -0.781465 | 2.919347  | 5.985689  |
| C  | -1.537190 | 1.822462  | 5.465411  |
| C  | -0.675068 | 0.707631  | 5.389065  |
| C  | 1.542074  | 3.351421  | 6.707405  |
| C  | 1.150470  | 4.609931  | 7.114929  |
| C  | -0.192544 | 5.044177  | 6.966720  |
| C  | -1.146875 | 4.221354  | 6.407537  |
| C  | 1.671430  | 4.798002  | 3.159602  |
| N  | 1.934669  | 3.514631  | 2.860120  |
| C  | 3.187716  | 3.275336  | 2.216537  |
| C  | 4.219331  | 2.566987  | 2.878745  |
| C  | 5.411322  | 2.305211  | 2.194239  |
| C  | 5.607380  | 2.733704  | 0.887197  |
| C  | 4.598445  | 3.445471  | 0.248288  |
| C  | 3.384100  | 3.729308  | 0.882572  |
| C  | 4.111842  | 2.169351  | 4.341056  |
| C  | 4.941177  | 3.130933  | 5.209670  |
| C  | 2.332675  | 4.527030  | 0.116898  |
| C  | 2.101680  | 4.008590  | -1.312322 |
| C  | 1.430210  | 0.298733  | 1.979777  |
| C  | 0.794954  | 1.192147  | 1.095498  |
| C  | -0.608498 | 1.026378  | 1.181196  |
| C  | -0.858112 | -0.076593 | 2.061735  |
| C  | 0.420764  | -0.542098 | 2.544846  |

|   |           |           |           |
|---|-----------|-----------|-----------|
| C | 0.486628  | -1.705026 | 3.350427  |
| C | -0.678945 | -2.377428 | 3.657709  |
| C | -1.940841 | -1.905223 | 3.205940  |
| C | -2.040413 | -0.769287 | 2.428615  |
| C | 4.523745  | 0.716233  | 4.611314  |
| C | 2.698319  | 6.020578  | 0.062444  |
| H | 4.590839  | 4.162675  | 5.106626  |
| H | 4.880831  | 2.853357  | 6.268519  |
| H | 5.997563  | 3.104411  | 4.918022  |
| H | 3.961876  | 0.012259  | 3.989541  |
| H | 4.342044  | 0.460061  | 5.661328  |
| H | 5.589758  | 0.550919  | 4.420541  |
| H | 3.642349  | 6.167654  | -0.475095 |
| H | 2.816432  | 6.447411  | 1.062253  |
| H | 1.920635  | 6.589724  | -0.459785 |
| H | 1.892801  | 2.934557  | -1.338167 |
| H | 2.968550  | 4.190205  | -1.956953 |
| H | 1.249965  | 4.529118  | -1.764559 |
| H | 6.208279  | 1.768579  | 2.702365  |
| H | 6.540422  | 2.521209  | 0.372135  |
| H | 4.756488  | 3.785962  | -0.771633 |
| H | 1.003761  | 7.280896  | 3.855641  |
| H | -1.318469 | 8.167626  | 4.052886  |
| H | -3.243193 | 6.594117  | 3.602040  |
| H | 2.486898  | 5.520618  | 3.206335  |
| H | -0.972183 | -0.288013 | 5.085052  |
| H | 1.501115  | 0.445946  | 5.797127  |
| H | -2.602929 | 1.812082  | 5.272769  |
| H | -2.175821 | 4.557820  | 6.316333  |
| H | 2.565258  | 3.020654  | 6.859103  |
| H | 1.876623  | 5.276860  | 7.572714  |
| H | -0.470464 | 6.037167  | 7.309500  |
| H | 1.447709  | -2.078768 | 3.694948  |
| H | 2.499981  | 0.198503  | 2.111705  |
| H | 1.304534  | 1.922408  | 0.482361  |
| H | -1.343646 | 1.522868  | 0.563408  |
| H | -3.008284 | -0.426980 | 2.072083  |
| H | -2.838702 | -2.457083 | 3.471140  |
| H | -0.636507 | -3.284552 | 4.254822  |
| H | -4.312486 | 4.292344  | 4.840926  |
| H | -4.827773 | 1.957550  | 0.931847  |
| H | -2.556792 | 3.312659  | 0.978230  |
| H | 3.063006  | 2.282454  | 4.635024  |
| H | 1.384728  | 4.434273  | 0.657080  |

Yb(II)N<sub>2</sub>H

E = -2662.222123

H = -2661.562402

G = -2661.671961

|    |           |           |           |
|----|-----------|-----------|-----------|
| Yb | -0.742908 | 0.332447  | -1.054797 |
| C  | 0.529950  | -0.162794 | -3.468280 |
| C  | -0.743313 | -0.779335 | -3.489456 |
| C  | 1.351342  | -0.908863 | -2.569966 |
| C  | 0.527983  | -1.950349 | -1.988493 |
| C  | -0.773791 | -1.848103 | -2.565917 |
| C  | 2.730251  | -0.852116 | -2.255555 |
| C  | 3.267229  | -1.777299 | -1.378963 |
| C  | 2.452456  | -2.769711 | -0.771231 |
| C  | 1.102957  | -2.856293 | -1.061309 |
| C  | -3.204555 | -0.269784 | -0.021505 |
| C  | -4.215653 | -0.732904 | -0.903880 |
| C  | -4.384118 | -2.091064 | -1.089757 |
| C  | -3.552692 | -3.030190 | -0.422770 |
| C  | -2.534806 | -2.613724 | 0.411994  |
| C  | -2.329495 | -1.227703 | 0.626110  |
| C  | -1.423544 | -0.495649 | 1.452037  |
| C  | -1.774934 | 0.870567  | 1.359657  |
| C  | -2.835375 | 1.029954  | 0.435962  |
| N  | 1.269170  | 1.450987  | -0.145418 |
| C  | 1.442892  | 2.770293  | -0.398173 |
| C  | 2.601538  | 3.456535  | -0.018124 |
| C  | 3.610401  | 2.767474  | 0.648493  |
| C  | 3.427012  | 1.411602  | 0.913973  |
| C  | 2.248006  | 0.798028  | 0.492559  |
| C  | 0.350604  | 3.494353  | -1.039441 |
| N  | -0.726986 | 2.923381  | -1.461985 |
| C  | -1.783940 | 3.788270  | -1.880335 |
| C  | -2.232871 | 3.710825  | -3.219975 |
| C  | -3.295308 | 4.524066  | -3.618274 |
| C  | -3.916553 | 5.389639  | -2.724358 |
| C  | -3.466190 | 5.456212  | -1.412266 |
| C  | -2.398928 | 4.673710  | -0.955750 |
| C  | -1.508478 | 2.844175  | -4.234084 |
| C  | -2.439487 | 2.183411  | -5.256174 |
| C  | -1.968293 | 4.833091  | 0.499092  |
| C  | -3.140369 | 4.721288  | 1.488077  |
| C  | -0.411506 | 3.655726  | -4.946237 |
| C  | -1.237577 | 6.170229  | 0.718462  |
| H  | 2.082137  | -0.260986 | 0.671552  |
| H  | -0.849697 | 4.485599  | -5.512774 |
| H  | 0.143051  | 3.021616  | -5.646728 |
| H  | 0.303122  | 4.080095  | -4.233179 |
| H  | -3.253306 | 1.637769  | -4.767680 |
| H  | -1.875768 | 1.474446  | -5.871566 |
| H  | -2.885997 | 2.913751  | -5.939949 |
| H  | -1.901231 | 7.014515  | 0.500734  |
| H  | -0.359988 | 6.276232  | 0.072451  |
| H  | -0.907754 | 6.262347  | 1.759311  |
| H  | -3.707972 | 3.798419  | 1.348072  |

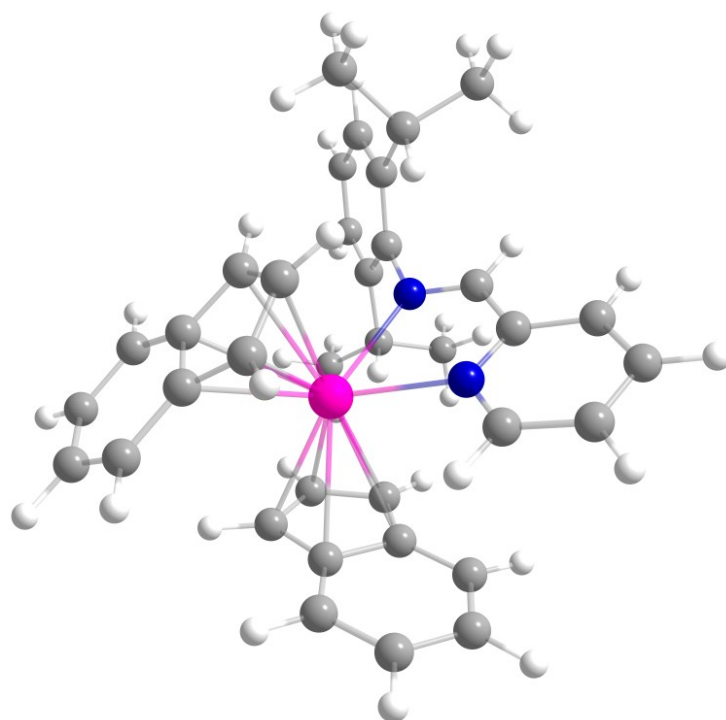

|   |           |           |           |
|---|-----------|-----------|-----------|
| H | -3.835238 | 5.562948  | 1.394448  |
| H | -2.760102 | 4.728702  | 2.515395  |
| H | -3.640687 | 4.483894  | -4.646920 |
| H | -4.745986 | 6.011148  | -3.050564 |
| H | -3.955134 | 6.134919  | -0.718650 |
| H | 2.697706  | 4.515406  | -0.240384 |
| H | 4.518376  | 3.277747  | 0.956045  |
| H | 4.180760  | 0.827955  | 1.432051  |
| H | 0.473431  | 4.579377  | -1.113402 |
| H | 3.366255  | -0.100920 | -2.719775 |
| H | 4.331588  | -1.754443 | -1.156404 |
| H | 2.903949  | -3.483041 | -0.085994 |
| H | 0.492006  | -3.637387 | -0.615384 |
| H | -1.617008 | -2.497246 | -2.366180 |
| H | -1.574402 | -0.485825 | -4.122578 |
| H | 0.864435  | 0.647924  | -4.104762 |
| H | -3.724217 | -4.092813 | -0.575797 |
| H | -5.172029 | -2.451813 | -1.746172 |
| H | -4.876973 | -0.023159 | -1.397188 |
| H | -1.907121 | -3.342027 | 0.921000  |
| H | -0.681294 | -0.923316 | 2.116628  |
| H | -1.297556 | 1.673618  | 1.911537  |
| H | -3.324530 | 1.956652  | 0.164618  |
| H | -1.004888 | 2.044963  | -3.678829 |
| H | -1.273421 | 4.023144  | 0.743822  |

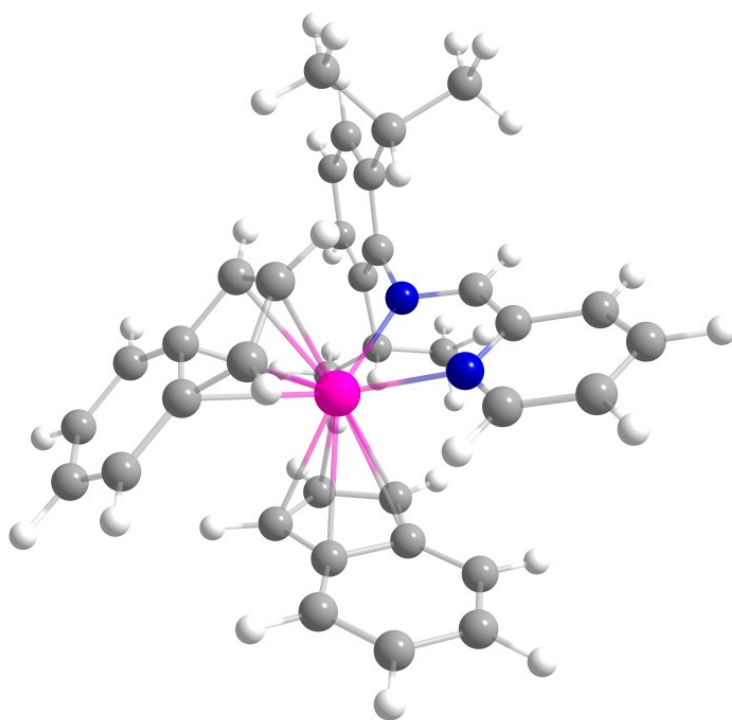

Yb(III)N<sub>2</sub>H

E = -2662.208047

H = -2661.549040

G = -2661.657823

|    |           |           |           |
|----|-----------|-----------|-----------|
| Yb | -0.694072 | 0.553180  | -1.079015 |
| C  | 0.437749  | -1.774806 | -1.916251 |
| C  | -0.857200 | -1.610218 | -2.502097 |
| C  | -0.770727 | -0.547536 | -3.430647 |
| C  | 0.527742  | 0.013543  | -3.391018 |
| C  | 1.306505  | -0.770307 | -2.485519 |
| C  | 0.965158  | -2.713699 | -0.990712 |
| C  | 2.311280  | -2.678202 | -0.690036 |
| C  | 3.168879  | -1.706257 | -1.273426 |
| C  | 2.682613  | -0.756086 | -2.145792 |
| C  | -3.104716 | -0.215388 | -0.097591 |
| C  | -4.130463 | -0.686880 | -0.957293 |
| C  | -4.301117 | -2.048185 | -1.115436 |
| C  | -3.462697 | -2.975035 | -0.441965 |
| C  | -2.424972 | -2.546697 | 0.362711  |
| C  | -2.213105 | -1.158511 | 0.538356  |
| C  | -1.293130 | -0.409007 | 1.340942  |
| C  | -1.684075 | 0.946871  | 1.282264  |
| C  | -2.749727 | 1.091316  | 0.362706  |

|   |           |           |           |
|---|-----------|-----------|-----------|
| N | 1.218871  | 1.545648  | -0.161139 |
| C | 1.405461  | 2.850039  | -0.582338 |
| C | 2.599579  | 3.544517  | -0.245365 |
| C | 3.545969  | 2.942698  | 0.549583  |
| C | 3.321862  | 1.623080  | 1.011090  |
| C | 2.164270  | 0.980808  | 0.613651  |
| C | 0.358939  | 3.473007  | -1.295348 |
| N | -0.807685 | 2.858724  | -1.577772 |
| C | -1.867172 | 3.725640  | -1.980622 |
| C | -2.340961 | 3.690165  | -3.314679 |
| C | -3.411121 | 4.513207  | -3.676387 |
| C | -4.004862 | 5.373125  | -2.760377 |
| C | -3.520552 | 5.421222  | -1.458707 |
| C | -2.458217 | 4.613182  | -1.039038 |
| C | -1.638261 | 2.856046  | -4.371822 |
| C | -2.591001 | 2.194627  | -5.373133 |
| C | -1.972199 | 4.735023  | 0.404043  |
| C | -3.109668 | 4.648533  | 1.435490  |
| C | -0.578674 | 3.700605  | -5.101896 |
| C | -1.191404 | 6.043299  | 0.613654  |
| H | 1.974045  | -0.046771 | 0.913799  |
| H | -1.049224 | 4.523300  | -5.652666 |
| H | -0.019720 | 3.088081  | -5.820099 |
| H | 0.136647  | 4.135785  | -4.396639 |
| H | -3.385581 | 1.632154  | -4.870650 |
| H | -2.040037 | 1.503419  | -6.020702 |
| H | -3.069569 | 2.929499  | -6.029804 |
| H | -1.832015 | 6.914054  | 0.431424  |
| H | -0.333489 | 6.118171  | -0.061106 |
| H | -0.819809 | 6.109867  | 1.642563  |
| H | -3.708780 | 3.741857  | 1.316785  |
| H | -3.787620 | 5.506201  | 1.365763  |
| H | -2.697746 | 4.646173  | 2.450841  |
| H | -3.775062 | 4.497059  | -4.700063 |
| H | -4.836487 | 6.005626  | -3.060451 |
| H | -3.982609 | 6.102763  | -0.749810 |
| H | 2.734610  | 4.559811  | -0.607840 |
| H | 4.452802  | 3.474749  | 0.823444  |
| H | 4.039121  | 1.110653  | 1.642436  |
| H | 0.491358  | 4.519092  | -1.574237 |
| H | 3.345923  | -0.013903 | -2.582402 |
| H | 4.226197  | -1.714037 | -1.021953 |
| H | 2.729962  | -3.412620 | -0.006685 |
| H | 0.321278  | -3.476951 | -0.563044 |
| H | -1.726442 | -2.228339 | -2.319617 |
| H | -1.585595 | -0.213054 | -4.063141 |
| H | 0.894929  | 0.831491  | -3.998889 |
| H | -3.645862 | -4.039475 | -0.563558 |
| H | -5.102241 | -2.420517 | -1.748371 |
| H | -4.799803 | 0.015680  | -1.448349 |

|   |           |           |           |
|---|-----------|-----------|-----------|
| H | -1.797411 | -3.265566 | 0.883244  |
| H | -0.528314 | -0.826025 | 1.985282  |
| H | -1.201914 | 1.758881  | 1.813554  |
| H | -3.243420 | 2.015384  | 0.090180  |
| H | -1.284603 | 3.905255  | 0.593277  |
| H | -1.096056 | 2.067939  | -3.842926 |

### Yb(Cp\*2) with the same Ipy ligands

Yb(Cp\*2)

E = -1939.650074

H = -1939.179828

G = -1939.270840

|    |           |          |           |
|----|-----------|----------|-----------|
| C  | -0.379794 | 1.733867 | 0.251920  |
| C  | 0.395914  | 3.020714 | 0.163833  |
| C  | 0.706758  | 3.885270 | 1.255653  |
| C  | 0.316773  | 3.664956 | 2.692428  |
| C  | 1.336752  | 5.051534 | 0.728863  |
| C  | 1.416324  | 4.907785 | -0.688104 |
| C  | 0.834059  | 3.653501 | -1.037608 |
| Yb | 3.040088  | 3.056521 | 0.312263  |
| C  | 5.260791  | 1.840858 | 1.087454  |
| C  | 5.153350  | 1.585260 | -0.312036 |
| C  | 5.337015  | 2.820550 | -1.001328 |
| C  | 5.558658  | 3.839483 | -0.028015 |
| C  | 5.511597  | 3.234364 | 1.262716  |
| C  | 5.246913  | 0.801386 | 2.175701  |
| C  | 5.007383  | 0.231175 | -0.952196 |
| C  | 5.428669  | 2.991725 | -2.493138 |
| C  | 5.925612  | 5.269359 | -0.316312 |
| C  | 5.806487  | 3.922112 | 2.568191  |
| C  | 0.602538  | 3.150903 | -2.436800 |
| C  | 1.896208  | 5.957116 | -1.652982 |
| C  | 1.718178  | 6.278063 | 1.512085  |
| H  | 1.384549  | 3.480112 | -3.130413 |
| H  | 0.566446  | 2.056425 | -2.484368 |
| H  | -0.351859 | 3.513417 | -2.844354 |
| H  | -0.136784 | 1.046160 | -0.566297 |
| H  | -0.197151 | 1.198363 | 1.191352  |
| H  | -1.463615 | 1.909748 | 0.200587  |
| H  | 0.274027  | 2.600783 | 2.952577  |
| H  | 1.013803  | 4.142576 | 3.390885  |
| H  | -0.677621 | 4.079392 | 2.910836  |
| H  | 1.986836  | 6.041876 | 2.547945  |
| H  | 2.570509  | 6.804224 | 1.067907  |
| H  | 0.890975  | 7.000493 | 1.558714  |
| H  | 2.683277  | 6.584448 | -1.220656 |

|   |          |           |           |
|---|----------|-----------|-----------|
| H | 2.298745 | 5.519970  | -2.573518 |
| H | 1.082057 | 6.631994  | -1.953313 |
| H | 4.785554 | 2.287559  | -3.033490 |
| H | 5.142856 | 4.000549  | -2.810348 |
| H | 6.452457 | 2.824519  | -2.856801 |
| H | 4.418805 | -0.460827 | -0.337877 |
| H | 4.523032 | 0.287452  | -1.933842 |
| H | 5.983449 | -0.248432 | -1.112489 |
| H | 4.902843 | 1.207288  | 3.134157  |
| H | 4.599973 | -0.049771 | 1.931462  |
| H | 6.249808 | 0.388255  | 2.354131  |
| H | 5.495976 | 4.973120  | 2.562129  |
| H | 5.303526 | 3.439782  | 3.414303  |
| H | 6.881642 | 3.913651  | 2.796911  |
| H | 5.473286 | 5.632318  | -1.245588 |
| H | 5.610088 | 5.947096  | 0.484723  |
| H | 7.012665 | 5.393252  | -0.423561 |

Yb(Cp\*<sub>2</sub>)(THF)<sub>2</sub>

E = -2404.428175

H = -2403.707089

G = -2403.824408

|    |           |           |           |
|----|-----------|-----------|-----------|
| Yb | 0.662849  | 1.223448  | 0.485264  |
| C  | 1.125990  | 3.927406  | 0.334502  |
| C  | 1.478489  | 3.574968  | 1.669194  |
| C  | 2.096138  | 3.352377  | -0.535524 |
| C  | 2.657935  | 2.780567  | 1.623758  |
| C  | 3.040335  | 2.642150  | 0.258983  |
| C  | -1.317661 | -0.505921 | -0.382496 |
| C  | -1.572230 | 0.724552  | -1.053751 |
| C  | -0.518883 | 0.947465  | -1.982651 |
| C  | 0.400547  | -0.133715 | -1.875808 |
| C  | -0.102801 | -1.039231 | -0.896404 |
| C  | 0.434127  | -2.419103 | -0.643851 |
| O  | -0.947668 | 1.341548  | 2.535748  |
| C  | -2.007224 | 2.313853  | 2.429655  |
| C  | -2.448534 | 2.592586  | 3.858310  |
| C  | -2.268763 | 1.217216  | 4.507613  |
| C  | -1.012946 | 0.686084  | 3.816211  |
| O  | 1.985407  | -0.633450 | 1.717833  |
| C  | 1.503109  | -1.590036 | 2.679533  |
| C  | 2.491984  | -2.749462 | 2.654161  |
| C  | 3.800331  | -2.037759 | 2.301836  |
| C  | 3.327234  | -0.980046 | 1.312236  |
| H  | -2.822137 | 1.889771  | 1.831602  |
| H  | -1.595414 | 3.180914  | 1.908122  |
| H  | -0.102424 | 0.936364  | 4.375481  |

|   |           |           |           |
|---|-----------|-----------|-----------|
| H | -1.045530 | -0.395662 | 3.655549  |
| H | -3.128555 | 0.575575  | 4.285490  |
| H | -2.153227 | 1.262758  | 5.594105  |
| H | 4.233499  | -1.565043 | 3.190590  |
| H | 4.552387  | -2.703075 | 1.868913  |
| H | 2.530329  | -3.282360 | 3.608522  |
| H | 2.222259  | -3.466273 | 1.871433  |
| H | 1.478960  | -1.109831 | 3.666868  |
| H | 0.486097  | -1.877571 | 2.397966  |
| H | 3.925018  | -0.068508 | 1.319480  |
| H | 3.291191  | -1.372168 | 0.287859  |
| H | -3.476573 | 2.961808  | 3.910988  |
| H | -1.791811 | 3.332889  | 4.326697  |
| C | 0.065021  | 4.914899  | -0.069763 |
| C | 0.891271  | 4.142944  | 2.929410  |
| C | 3.429401  | 2.348229  | 2.839435  |
| C | 4.325846  | 2.075039  | -0.281125 |
| C | -2.264516 | -1.202400 | 0.554132  |
| C | -2.843158 | 1.527873  | -1.000547 |
| C | -0.552179 | 1.992628  | -3.060045 |
| C | 1.580016  | -0.386228 | -2.773258 |
| C | 2.297107  | 3.671301  | -1.989006 |
| H | -0.062532 | 4.649216  | 2.746370  |
| H | 0.720788  | 3.381742  | 3.701217  |
| H | 1.559193  | 4.895313  | 3.375116  |
| H | -0.217084 | 4.796626  | -1.120900 |
| H | -0.859728 | 4.822474  | 0.514467  |
| H | 0.407034  | 5.953242  | 0.052008  |
| H | 4.347336  | 1.814065  | 2.573082  |
| H | 3.737852  | 3.213226  | 3.443850  |
| H | 2.856625  | 1.689583  | 3.507089  |
| H | 4.180994  | 1.251843  | -0.994315 |
| H | 4.900153  | 2.845924  | -0.813391 |
| H | 4.976744  | 1.702640  | 0.517174  |
| H | 1.389399  | 4.057184  | -2.459279 |
| H | 3.073105  | 4.441865  | -2.116183 |
| H | 2.622464  | 2.801635  | -2.571360 |
| H | 1.528609  | -2.459593 | -0.687651 |
| H | 0.131170  | -2.814546 | 0.331874  |
| H | 0.067957  | -3.134561 | -1.395236 |
| H | -2.740755 | -0.510953 | 1.259525  |
| H | -3.075974 | -1.710888 | 0.012786  |
| H | -1.761164 | -1.972091 | 1.150327  |
| H | -3.499221 | 1.197196  | -0.188476 |
| H | -2.671928 | 2.604604  | -0.869436 |
| H | -3.420795 | 1.418350  | -1.930210 |
| H | -0.861753 | 2.975675  | -2.686622 |
| H | 0.418643  | 2.117508  | -3.546021 |



|   |           |           |           |
|---|-----------|-----------|-----------|
| H | -1.269504 | 1.716260  | -3.847784 |
| H | 2.018174  | 0.546026  | -3.144107 |
| H | 2.380741  | -0.936201 | -2.263643 |
| H | 1.304954  | -0.982455 | -3.656215 |

Yb(II)N2Ph

E = -2979.016984

H = -2978.077823

G = -2978.219329

|    |           |           |           |
|----|-----------|-----------|-----------|
| Yb | 1.202549  | 2.482741  | 1.303132  |
| C  | 1.568369  | 5.168918  | 1.823671  |
| C  | 1.787222  | 4.537485  | 3.081369  |
| C  | 2.654291  | 4.828468  | 0.971871  |
| C  | -0.525318 | 1.128122  | -0.315093 |
| C  | 0.773346  | 0.783573  | -0.788021 |
| C  | -0.750725 | 2.501893  | -0.619645 |
| C  | 1.346958  | 1.939657  | -1.388551 |
| C  | 0.397365  | 2.995766  | -1.298755 |
| C  | 2.626364  | 1.954783  | -2.177318 |
| C  | 2.992713  | 3.781289  | 2.996096  |
| C  | 3.521665  | 3.957390  | 1.686236  |
| C  | 4.896125  | 3.573826  | 1.218274  |
| N  | -0.067902 | 1.735613  | 3.862733  |
| C  | 0.880726  | 1.080989  | 4.572829  |
| C  | 0.968182  | 1.131817  | 5.969544  |
| C  | 0.037401  | 1.879766  | 6.678769  |
| C  | -0.981745 | 2.494839  | 5.964573  |
| C  | -1.016437 | 2.390324  | 4.563038  |
| C  | 1.775454  | 0.139721  | 3.892668  |
| N  | 1.970525  | 0.051929  | 2.624521  |
| C  | 2.566083  | -1.194574 | 2.223949  |
| C  | 1.786853  | -2.377686 | 2.323273  |
| C  | 2.362892  | -3.584618 | 1.911806  |
| C  | 3.659993  | -3.644482 | 1.419317  |
| C  | 4.408706  | -2.477137 | 1.333127  |
| C  | 3.885010  | -1.241196 | 1.725287  |
| C  | 0.352806  | -2.407703 | 2.845439  |
| C  | 0.282847  | -3.004970 | 4.261574  |
| C  | 4.779405  | -0.015504 | 1.701532  |
| C  | 5.690562  | -0.009629 | 2.941499  |
| C  | -2.215005 | 2.919077  | 3.864523  |
| C  | -2.751051 | 4.175111  | 4.187449  |
| C  | -3.958289 | 4.593702  | 3.632205  |
| C  | -4.661444 | 3.751649  | 2.769250  |
| C  | -4.139310 | 2.498343  | 2.449611  |
| C  | -2.918046 | 2.089054  | 2.982683  |
| C  | -0.598061 | -3.177843 | 1.915556  |
| C  | 5.624251  | 0.085761  | 0.425435  |
| H  | 0.643078  | -4.039968 | 4.263757  |
| H  | -0.750265 | -3.007708 | 4.627542  |
| H  | 0.893652  | -2.445432 | 4.976971  |
| H  | -0.544053 | -2.812290 | 0.886691  |
| H  | -1.631426 | -3.064063 | 2.261328  |

|   |           |           |           |
|---|-----------|-----------|-----------|
| H | -0.377147 | -4.250588 | 1.904118  |
| H | 6.360312  | -0.877322 | 2.926450  |
| H | 5.112525  | -0.055270 | 3.870248  |
| H | 6.310209  | 0.893655  | 2.969010  |
| H | 5.005075  | 0.027479  | -0.474664 |
| H | 6.372875  | -0.711854 | 0.369975  |
| H | 6.165997  | 1.035655  | 0.405223  |
| H | 1.778300  | -4.497905 | 1.977517  |
| H | 4.085663  | -4.594261 | 1.107241  |
| H | 5.427782  | -2.527254 | 0.961594  |
| H | 1.750833  | 0.577073  | 6.478797  |
| H | 0.079775  | 1.946357  | 7.761905  |
| H | -1.782107 | 3.018825  | 6.476172  |
| H | 2.228009  | -0.599482 | 4.564879  |
| H | -4.684682 | 1.835325  | 1.783429  |
| H | -5.610120 | 4.071410  | 2.347209  |
| H | -4.352050 | 5.576117  | 3.877724  |
| H | -2.216402 | 4.832272  | 4.868109  |
| H | -2.512581 | 1.112191  | 2.740487  |
| C | 1.318957  | -0.609598 | -0.908243 |
| C | -1.544425 | 0.150429  | 0.200367  |
| C | -2.036003 | 3.268859  | -0.490933 |
| C | 3.026827  | 5.492634  | -0.320579 |
| C | 0.494598  | 6.184263  | 1.546202  |
| C | 1.063196  | 4.900665  | 4.343290  |
| H | -0.015239 | -1.378239 | 2.895799  |
| H | 4.134906  | 0.871494  | 1.752068  |
| C | 3.714353  | 3.142541  | 4.148109  |
| C | 0.420775  | 4.288544  | -2.061405 |
| H | 0.902809  | -1.283729 | -0.155655 |
| H | 1.081112  | -1.040083 | -1.893024 |
| H | 2.408110  | -0.652288 | -0.802535 |
| H | 3.039321  | 2.963460  | -2.276939 |
| H | 3.402884  | 1.332485  | -1.718290 |
| H | 2.478064  | 1.568651  | -3.196736 |
| H | 1.417059  | 4.530041  | -2.438039 |
| H | -0.243721 | 4.225654  | -2.936110 |
| H | 0.075046  | 5.143287  | -1.469325 |
| H | -2.711733 | 2.826873  | 0.243935  |
| H | -1.868693 | 4.308418  | -0.185129 |
| H | -2.576903 | 3.306377  | -1.448654 |
| H | -2.499525 | 0.644775  | 0.399914  |
| H | -1.746656 | -0.637019 | -0.538979 |
| H | -1.237172 | -0.356580 | 1.123362  |
| H | 3.365230  | 4.782640  | -1.082812 |
| H | 2.200023  | 6.064727  | -0.746411 |
| H | 3.855042  | 6.198678  | -0.158788 |
| H | 0.336851  | 6.328452  | 0.473162  |
| H | -0.472338 | 5.898132  | 1.977391  |
| H | 0.748576  | 7.168786  | 1.966721  |
| H | -0.011357 | 5.034379  | 4.182052  |
| H | 1.189826  | 4.153481  | 5.131414  |
| H | 1.438008  | 5.853618  | 4.746980  |
| H | 4.156875  | 2.174185  | 3.889634  |
| H | 4.536864  | 3.778117  | 4.508165  |

|   |          |          |          |
|---|----------|----------|----------|
| H | 3.050560 | 2.976635 | 5.001714 |
| H | 5.369128 | 2.855391 | 1.893432 |
| H | 4.898680 | 3.138527 | 0.211963 |
| H | 5.557113 | 4.452768 | 1.179507 |

Yb(III)N2Ph

E = -2979.010734

H = -2978.072649

G = -2978.208769

|    |           |           |           |
|----|-----------|-----------|-----------|
| Yb | 1.255689  | 2.340664  | 1.501598  |
| C  | 1.640743  | 4.992578  | 1.921064  |
| C  | 1.880782  | 4.374507  | 3.179278  |
| C  | 2.708670  | 4.629502  | 1.049309  |
| C  | -0.503601 | 1.132506  | -0.090280 |
| C  | 0.790792  | 0.853518  | -0.636807 |
| C  | -0.770502 | 2.510593  | -0.286300 |
| C  | 1.311166  | 2.060076  | -1.181650 |
| C  | 0.334701  | 3.077564  | -0.990171 |
| C  | 2.547512  | 2.147628  | -2.030981 |
| C  | 3.086440  | 3.615517  | 3.081104  |
| C  | 3.588334  | 3.763720  | 1.760736  |
| C  | 4.976442  | 3.422651  | 1.300643  |
| N  | -0.095125 | 1.813783  | 3.577217  |
| C  | 0.850052  | 1.166722  | 4.364144  |
| C  | 0.780219  | 1.193841  | 5.786236  |
| C  | -0.279951 | 1.795837  | 6.412825  |
| C  | -1.293245 | 2.361055  | 5.611739  |
| C  | -1.164669 | 2.339528  | 4.225159  |
| C  | 1.854655  | 0.373675  | 3.762670  |
| N  | 2.035945  | 0.223005  | 2.438135  |
| C  | 2.598058  | -1.053971 | 2.106423  |
| C  | 1.830842  | -2.230377 | 2.348373  |
| C  | 2.370005  | -3.477736 | 2.014351  |
| C  | 3.635740  | -3.604087 | 1.456273  |
| C  | 4.390493  | -2.457628 | 1.249130  |
| C  | 3.902692  | -1.187177 | 1.572607  |
| C  | 0.436278  | -2.211527 | 2.966110  |
| C  | 0.463059  | -2.696467 | 4.425203  |
| C  | 4.847802  | -0.009288 | 1.443753  |
| C  | 5.881682  | -0.048257 | 2.582897  |
| C  | -2.351369 | 2.847377  | 3.471418  |
| C  | -2.616882 | 4.215185  | 3.341247  |
| C  | -3.829440 | 4.656907  | 2.808558  |
| C  | -4.801530 | 3.736084  | 2.418315  |
| C  | -4.550922 | 2.369453  | 2.554231  |
| C  | -3.334367 | 1.929770  | 3.075149  |
| C  | -0.574682 | -3.048951 | 2.165747  |
| C  | 5.566879  | 0.043736  | 0.089818  |
| H  | 0.810363  | -3.734720 | 4.482585  |
| H  | -0.540147 | -2.652615 | 4.865087  |
| H  | 1.130037  | -2.089080 | 5.043743  |
| H  | -0.576708 | -2.782797 | 1.104861  |
| H  | -1.586139 | -2.891542 | 2.557394  |
| H  | -0.364281 | -4.121523 | 2.239124  |

|   |           |           |           |
|---|-----------|-----------|-----------|
| H | 6.493468  | -0.955656 | 2.514574  |
| H | 5.398827  | -0.053192 | 3.565264  |
| H | 6.559235  | 0.812407  | 2.536557  |
| H | 4.861045  | 0.049565  | -0.746341 |
| H | 6.233715  | -0.814180 | -0.050091 |
| H | 6.186030  | 0.944193  | 0.020343  |
| H | 1.781292  | -4.372604 | 2.197848  |
| H | 4.034044  | -4.582763 | 1.201904  |
| H | 5.395210  | -2.550700 | 0.845405  |
| H | 1.563864  | 0.699088  | 6.353308  |
| H | -0.356452 | 1.812069  | 7.496443  |
| H | -2.186250 | 2.789762  | 6.052909  |
| H | 2.459602  | -0.222414 | 4.449940  |
| H | -5.305964 | 1.643924  | 2.262592  |
| H | -5.750944 | 4.080769  | 2.017725  |
| H | -4.019040 | 5.722778  | 2.712341  |
| H | -1.878985 | 4.936608  | 3.678062  |
| H | -3.148609 | 0.867293  | 3.203558  |
| C | 1.358841  | -0.511849 | -0.879106 |
| C | -1.457389 | 0.108157  | 0.448056  |
| C | -2.075815 | 3.227566  | -0.112490 |
| C | 3.098208  | 5.342558  | -0.211950 |
| C | 0.591559  | 6.033473  | 1.630211  |
| C | 1.175046  | 4.726905  | 4.456054  |
| H | 0.084230  | -1.175946 | 2.967099  |
| H | 4.251617  | 0.903353  | 1.555817  |
| C | 3.825329  | 2.993213  | 4.230498  |
| C | 0.231149  | 4.383697  | -1.720464 |
| H | 0.967094  | -1.255016 | -0.181804 |
| H | 1.108542  | -0.847946 | -1.896289 |
| H | 2.448678  | -0.538214 | -0.793295 |
| H | 2.804588  | 3.181709  | -2.271757 |
| H | 3.423386  | 1.699505  | -1.549850 |
| H | 2.405696  | 1.617942  | -2.983324 |
| H | 1.126676  | 4.603413  | -2.304477 |
| H | -0.606696 | 4.335318  | -2.430690 |
| H | 0.028509  | 5.238376  | -1.066339 |
| H | -2.754065 | 2.700715  | 0.558836  |
| H | -1.944815 | 4.238316  | 0.286884  |
| H | -2.584690 | 3.332855  | -1.081576 |
| H | -2.426445 | 0.557879  | 0.673568  |
| H | -1.630579 | -0.686104 | -0.289826 |
| H | -1.094539 | -0.373131 | 1.360223  |
| H | 3.823911  | 4.767852  | -0.794363 |
| H | 2.253579  | 5.568350  | -0.860021 |
| H | 3.577940  | 6.300041  | 0.039107  |
| H | 0.767198  | 6.497845  | 0.655963  |
| H | -0.433655 | 5.644307  | 1.621228  |
| H | 0.621981  | 6.839302  | 2.375118  |
| H | 0.193670  | 5.167505  | 4.265233  |
| H | 1.030575  | 3.873768  | 5.123530  |
| H | 1.758222  | 5.474162  | 5.013157  |
| H | 4.284390  | 2.036716  | 3.963294  |
| H | 4.631344  | 3.653982  | 4.580472  |
| H | 3.162399  | 2.811670  | 5.080304  |

|   |          |          |          |
|---|----------|----------|----------|
| H | 5.453666 | 2.691415 | 1.955302 |
| H | 5.004217 | 3.028432 | 0.279843 |
| H | 5.609452 | 4.321380 | 1.311176 |

Yb(II)N2Fu

E = -2976.804772

H = -2975.896796

G = -2976.035832

|    |           |           |           |
|----|-----------|-----------|-----------|
| Yb | -3.392554 | -1.742313 | 1.135409  |
| C  | -6.039133 | -1.542268 | 0.360832  |
| C  | -6.020972 | -2.636847 | 1.270280  |
| C  | -5.278199 | -3.696584 | 0.673547  |
| C  | -4.848952 | -3.258331 | -0.611765 |
| C  | -5.328616 | -1.933986 | -0.807658 |
| C  | -2.397827 | 0.805535  | 0.656873  |
| C  | -2.046533 | 0.026759  | -0.483348 |
| C  | -1.101069 | -0.955634 | -0.076291 |
| C  | -0.863671 | -0.779256 | 1.315983  |
| C  | -1.660831 | 0.307649  | 1.769431  |
| C  | -3.207978 | 2.073418  | 0.605853  |
| C  | -2.365305 | 0.395055  | -1.903244 |
| C  | -1.547255 | 0.927401  | 3.133299  |
| C  | 0.188102  | -1.464741 | 2.136280  |
| C  | -0.346499 | -1.874994 | -0.995350 |
| C  | -6.843265 | -2.736984 | 2.522031  |
| C  | -5.157768 | -5.093327 | 1.211957  |
| C  | -4.243615 | -4.111630 | -1.689438 |
| C  | -5.352641 | -1.215834 | -2.124601 |
| C  | -6.863928 | -0.292527 | 0.497920  |
| O  | -4.372941 | -0.673665 | 3.246975  |
| C  | -4.519110 | -1.319594 | 4.441351  |
| C  | -5.149404 | -0.482909 | 5.327893  |
| C  | -5.421757 | 0.727476  | 4.630492  |
| C  | -4.932235 | 0.562038  | 3.371260  |
| C  | -4.044750 | -2.689459 | 4.544741  |
| C  | -4.449385 | -3.424821 | 5.673562  |
| C  | -4.008572 | -4.726417 | 5.829279  |
| C  | -3.141341 | -5.236464 | 4.870155  |
| C  | -2.768695 | -4.446058 | 3.774898  |
| N  | -3.245237 | -3.191161 | 3.576038  |
| C  | -1.710201 | -5.040634 | 2.940270  |
| N  | -1.157084 | -4.546572 | 1.898881  |
| C  | 0.035326  | -5.188543 | 1.459811  |
| C  | 0.074296  | -5.749528 | 0.159524  |
| C  | 1.265598  | -6.315863 | -0.295996 |
| C  | 2.408717  | -6.332332 | 0.497700  |
| C  | 2.359354  | -5.784294 | 1.771563  |
| C  | 1.190508  | -5.208781 | 2.287622  |

|   |           |           |           |
|---|-----------|-----------|-----------|
| C | -1.187760 | -5.834334 | -0.676043 |
| C | -0.938743 | -5.748787 | -2.184578 |
| C | 1.250014  | -4.638946 | 3.701129  |
| C | 2.429731  | -3.672607 | 3.898744  |
| C | -1.951002 | -7.128113 | -0.337452 |
| C | 1.321967  | -5.759478 | 4.752821  |
| H | -2.885189 | -7.191255 | -0.906813 |
| H | -2.198603 | -7.186454 | 0.727330  |
| H | -1.343220 | -8.005632 | -0.586891 |
| H | -0.344922 | -4.867785 | -2.447123 |
| H | -1.892215 | -5.687255 | -2.718355 |
| H | -0.418942 | -6.635849 | -2.563942 |
| H | 2.234078  | -6.353341 | 4.624548  |
| H | 0.474889  | -6.449788 | 4.682466  |
| H | 1.336227  | -5.338868 | 5.765069  |
| H | 2.446581  | -2.895427 | 3.130964  |
| H | 3.392554  | -4.194679 | 3.873072  |
| H | 2.352326  | -3.183598 | 4.876308  |
| H | 1.300572  | -6.755297 | -1.287944 |
| H | 3.329858  | -6.771845 | 0.124835  |
| H | 3.252993  | -5.800356 | 2.389615  |
| H | -2.733772 | -6.237842 | 4.966191  |
| H | -4.318789 | -5.324216 | 6.680893  |
| H | -5.115821 | -2.973478 | 6.399594  |
| H | -1.341074 | -5.988155 | 3.354805  |
| H | -5.389357 | -0.698922 | 6.358816  |
| H | -5.909814 | 1.611535  | 5.014888  |
| H | -4.893566 | 1.184718  | 2.492443  |
| H | -3.944825 | -5.088447 | -1.301085 |
| H | -4.965004 | -4.297772 | -2.498324 |
| H | -3.360091 | -3.658821 | -2.156059 |
| H | -5.421156 | -0.130138 | -2.006707 |
| H | -4.467145 | -1.424339 | -2.731957 |
| H | -6.226726 | -1.525256 | -2.718018 |
| H | -7.065151 | -0.043852 | 1.545511  |
| H | -6.380397 | 0.579527  | 0.041072  |
| H | -7.843203 | -0.398797 | 0.007962  |
| H | -6.429458 | -3.454486 | 3.238525  |
| H | -6.941535 | -1.775869 | 3.039503  |
| H | -7.865657 | -3.075898 | 2.298230  |
| H | -5.303094 | -5.125764 | 2.296381  |
| H | -5.912063 | -5.762758 | 0.772503  |
| H | -4.179351 | -5.540150 | 1.003996  |
| H | -4.227587 | 1.928500  | 0.221675  |
| H | -3.286985 | 2.542886  | 1.592423  |
| H | -2.738552 | 2.818479  | -0.051584 |
| H | -1.444674 | 0.174835  | 3.924504  |
| H | -0.662986 | 1.577985  | 3.202980  |
| H | -2.412768 | 1.546994  | 3.389405  |
| H | 0.516790  | -2.396915 | 1.671605  |

|   |           |           |           |
|---|-----------|-----------|-----------|
| H | 1.077326  | -0.826778 | 2.253088  |
| H | -0.159825 | -1.707145 | 3.147385  |
| H | -2.343553 | -0.468685 | -2.575511 |
| H | -3.349257 | 0.862085  | -2.002913 |
| H | -1.629420 | 1.115474  | -2.292096 |
| H | -0.014432 | -2.786747 | -0.488550 |
| H | -0.952358 | -2.181838 | -1.855506 |
| H | 0.554147  | -1.390931 | -1.400956 |
| H | 0.338363  | -4.062375 | 3.882767  |
| H | -1.819132 | -4.985013 | -0.387415 |

Yb(III)N2Fu

E = -2976.791169

H = -2975.882565

G = -2976.017355

|    |           |           |           |
|----|-----------|-----------|-----------|
| Yb | -3.219854 | -2.030107 | 1.329401  |
| C  | -5.888808 | -1.737593 | 0.692620  |
| C  | -5.749024 | -2.964824 | 1.397569  |
| C  | -5.005303 | -3.864933 | 0.576827  |
| C  | -4.676036 | -3.186148 | -0.628904 |
| C  | -5.230733 | -1.870629 | -0.555552 |
| C  | -2.476345 | 0.505340  | 0.551702  |
| C  | -1.992157 | -0.376365 | -0.471092 |
| C  | -0.996141 | -1.203482 | 0.095961  |
| C  | -0.856158 | -0.844209 | 1.468407  |
| C  | -1.755310 | 0.220692  | 1.744381  |
| C  | -3.337949 | 1.710215  | 0.296676  |
| C  | -2.218407 | -0.224769 | -1.946623 |
| C  | -1.729635 | 1.006853  | 3.023643  |
| C  | 0.196062  | -1.334248 | 2.408635  |
| C  | -0.074378 | -2.080742 | -0.694549 |
| C  | -6.469884 | -3.335579 | 2.658585  |
| C  | -4.830699 | -5.326457 | 0.863662  |
| C  | -4.134471 | -3.809397 | -1.882916 |
| C  | -5.436842 | -0.948642 | -1.720958 |
| C  | -6.841975 | -0.629927 | 1.034526  |
| O  | -4.382614 | -0.563945 | 3.207992  |
| C  | -4.439573 | -1.099668 | 4.470627  |
| C  | -4.997161 | -0.182926 | 5.320698  |
| C  | -5.308531 | 0.970436  | 4.540837  |
| C  | -4.919033 | 0.692902  | 3.269698  |
| C  | -3.969975 | -2.467260 | 4.615251  |
| C  | -4.284527 | -3.149256 | 5.780186  |
| C  | -3.908195 | -4.506604 | 5.898755  |
| C  | -3.201820 | -5.072470 | 4.867613  |
| C  | -2.838822 | -4.310658 | 3.723794  |
| N  | -3.278336 | -2.998667 | 3.565405  |
| C  | -1.923443 | -4.894109 | 2.820761  |
| N  | -1.379843 | -4.319117 | 1.755142  |
| C  | -0.171157 | -4.960687 | 1.347415  |

|   |           |           |           |
|---|-----------|-----------|-----------|
| C | -0.041590 | -5.524738 | 0.049889  |
| C | 1.167979  | -6.104442 | -0.341169 |
| C | 2.259743  | -6.165235 | 0.516168  |
| C | 2.128399  | -5.649750 | 1.797208  |
| C | 0.942502  | -5.050340 | 2.242696  |
| C | -1.228301 | -5.634982 | -0.888701 |
| C | -0.875593 | -5.456097 | -2.369854 |
| C | 0.937724  | -4.544751 | 3.685733  |
| C | 2.171635  | -3.688897 | 4.024716  |
| C | -1.912448 | -6.999527 | -0.684606 |
| C | 0.857881  | -5.706902 | 4.692390  |
| H | -2.815744 | -7.089337 | -1.301435 |
| H | -2.191403 | -7.156705 | 0.361497  |
| H | -1.230366 | -7.808512 | -0.971086 |
| H | -0.283553 | -4.553417 | -2.546757 |
| H | -1.787770 | -5.389246 | -2.972324 |
| H | -0.304395 | -6.307575 | -2.756665 |
| H | 1.726614  | -6.367811 | 4.592059  |
| H | -0.037305 | -6.317807 | 4.548415  |
| H | 0.844187  | -5.324130 | 5.719725  |
| H | 2.349134  | -2.904935 | 3.284238  |
| H | 3.081478  | -4.295835 | 4.089147  |
| H | 2.036723  | -3.208829 | 5.000890  |
| H | 1.251727  | -6.534810 | -1.335029 |
| H | 3.192735  | -6.619905 | 0.193901  |
| H | 2.972102  | -5.713399 | 2.479046  |
| H | -2.871442 | -6.106348 | 4.920076  |
| H | -4.170225 | -5.080393 | 6.782352  |
| H | -4.851465 | -2.655828 | 6.560901  |
| H | -1.598520 | -5.899948 | 3.100185  |
| H | -5.161316 | -0.313839 | 6.380230  |
| H | -5.759101 | 1.891545  | 4.882497  |
| H | -4.951214 | 1.237623  | 2.342697  |
| H | -3.864807 | -4.854247 | -1.721761 |
| H | -4.893175 | -3.794972 | -2.676985 |
| H | -3.250695 | -3.296478 | -2.279215 |
| H | -5.295609 | 0.107190  | -1.467526 |
| H | -4.769070 | -1.178989 | -2.552994 |
| H | -6.466730 | -1.045313 | -2.093890 |
| H | -7.011631 | -0.536030 | 2.110194  |
| H | -6.506684 | 0.343530  | 0.661381  |
| H | -7.822010 | -0.819701 | 0.573113  |
| H | -5.937476 | -4.099454 | 3.231639  |
| H | -6.623096 | -2.475503 | 3.316933  |
| H | -7.465599 | -3.739907 | 2.425791  |
| H | -4.680068 | -5.519059 | 1.929373  |
| H | -5.722189 | -5.890130 | 0.553718  |
| H | -3.975948 | -5.749810 | 0.336125  |
| H | -4.347719 | 1.462774  | -0.051728 |
| H | -3.437155 | 2.329875  | 1.192539  |



|   |           |           |           |
|---|-----------|-----------|-----------|
| H | -2.888821 | 2.349501  | -0.474303 |
| H | -1.873679 | 0.381324  | 3.912253  |
| H | -0.756720 | 1.502493  | 3.142621  |
| H | -2.492547 | 1.787357  | 3.050839  |
| H | 0.590549  | -2.295973 | 2.082304  |
| H | 1.036078  | -0.626282 | 2.459603  |
| H | -0.183048 | -1.457501 | 3.429016  |
| H | -2.430508 | -1.177094 | -2.444933 |
| H | -3.042875 | 0.455170  | -2.170028 |
| H | -1.318339 | 0.186870  | -2.425016 |
| H | 0.415772  | -2.836199 | -0.078762 |
| H | -0.595873 | -2.602510 | -1.502367 |
| H | 0.715717  | -1.476323 | -1.163839 |
| H | 0.054619  | -3.916575 | 3.827829  |
| H | -1.934662 | -4.849393 | -0.599758 |

Yb(II)N2H

E = -2748.061475

H = -2747.207779

G = -2747.337899

|    |           |           |           |
|----|-----------|-----------|-----------|
| Yb | -0.849246 | -0.017473 | -1.007514 |
| C  | 0.227505  | -2.374616 | -1.762666 |
| C  | 1.164741  | -1.369014 | -2.138618 |
| C  | 0.596392  | -0.614924 | -3.204889 |
| C  | -0.695283 | -1.149163 | -3.481075 |
| C  | -0.915182 | -2.247578 | -2.605868 |
| C  | -2.900892 | -1.154195 | 0.405594  |
| C  | -2.065814 | -0.519266 | 1.369103  |
| C  | -2.190808 | 0.888017  | 1.198302  |
| C  | -3.099076 | 1.121303  | 0.126043  |
| C  | -3.528174 | -0.138846 | -0.374705 |
| N  | -0.888888 | 2.270417  | -1.978869 |
| C  | -1.890629 | 2.471874  | -2.848361 |
| C  | -2.219030 | 3.711021  | -3.387124 |
| C  | -1.481836 | 4.827809  | -2.988404 |
| C  | -0.433998 | 4.636403  | -2.098577 |
| C  | -0.145087 | 3.346633  | -1.624945 |
| C  | 1.063469  | 3.175210  | -0.819749 |
| N  | 1.506164  | 2.056449  | -0.364982 |
| C  | 2.842162  | 2.073976  | 0.135044  |
| C  | 3.090563  | 1.649376  | 1.463258  |
| C  | 4.406112  | 1.620829  | 1.930107  |
| C  | 5.473126  | 1.992700  | 1.120473  |
| C  | 5.222127  | 2.408821  | -0.179141 |
| C  | 3.924809  | 2.464376  | -0.703614 |

|   |           |           |           |
|---|-----------|-----------|-----------|
| C | 1.957861  | 1.352189  | 2.428274  |
| C | 1.676301  | 2.595906  | 3.289994  |
| C | 3.781262  | 2.923445  | -2.152268 |
| C | 4.081492  | 4.424649  | -2.300548 |
| C | 2.228131  | 0.134934  | 3.320854  |
| C | 4.673513  | 2.118007  | -3.111085 |
| C | -3.698654 | 2.456360  | -0.202918 |
| H | -2.464403 | 1.590622  | -3.126372 |
| H | 2.562291  | 2.862906  | 3.877588  |
| H | 0.851444  | 2.412197  | 3.986627  |
| H | 1.412083  | 3.460692  | 2.672923  |
| H | 2.454648  | -0.758072 | 2.729714  |
| H | 1.353316  | -0.079922 | 3.943037  |
| H | 3.066472  | 0.306864  | 4.004463  |
| H | 5.118629  | 4.644687  | -2.024029 |
| H | 3.439792  | 5.039513  | -1.660733 |
| H | 3.936726  | 4.745282  | -3.338539 |
| H | 4.518896  | 1.041317  | -2.998892 |
| H | 5.736653  | 2.321680  | -2.944559 |
| H | 4.448432  | 2.386860  | -4.148995 |
| H | 4.599579  | 1.313820  | 2.953495  |
| H | 6.490159  | 1.962381  | 1.501699  |
| H | 6.056694  | 2.698948  | -0.811501 |
| H | 0.182405  | 5.470902  | -1.776570 |
| H | -1.713535 | 5.817656  | -3.369880 |
| H | -3.038449 | 3.792444  | -4.093835 |
| H | 1.638167  | 4.098055  | -0.674947 |
| C | -3.269128 | -2.609560 | 0.407654  |
| C | -1.354057 | -1.221266 | 2.492405  |
| C | -1.674278 | 1.952371  | 2.123081  |
| C | -1.572353 | -0.776367 | -4.644860 |
| C | 1.294720  | 0.429937  | -4.025564 |
| C | 2.565733  | -1.255971 | -1.609609 |
| H | 1.059823  | 1.147812  | 1.833487  |
| H | 2.747860  | 2.759019  | -2.470897 |
| C | -4.615306 | -0.350698 | -1.392922 |
| C | -2.029647 | -3.241995 | -2.757970 |
| C | 0.496164  | -3.478968 | -0.777454 |
| H | -3.725813 | -2.917038 | -0.535699 |
| H | -2.410615 | -3.266645 | 0.584086  |
| H | -4.000492 | -2.824126 | 1.200690  |
| H | -4.638156 | 0.445005  | -2.147061 |
| H | -4.503077 | -1.298711 | -1.928987 |
| H | -5.611423 | -0.365967 | -0.926748 |
| H | -2.976236 | 3.274839  | -0.105875 |
| H | -4.105743 | 2.495532  | -1.218848 |
| H | -4.534272 | 2.688105  | 0.474415  |
| H | -1.059843 | 1.521532  | 2.917998  |
| H | -1.067417 | 2.716841  | 1.619640  |
| H | -2.501628 | 2.483522  | 2.614384  |

|   |           |           |           |
|---|-----------|-----------|-----------|
| H | -1.225712 | -2.287330 | 2.279737  |
| H | -0.357811 | -0.812460 | 2.688297  |
| H | -1.916183 | -1.149937 | 3.434983  |
| H | -0.418171 | -4.018572 | -0.513071 |
| H | 1.200089  | -4.219750 | -1.182985 |
| H | 0.934311  | -3.112977 | 0.159546  |
| H | -3.010783 | -2.767681 | -2.873681 |
| H | -1.873373 | -3.862385 | -3.652462 |
| H | -2.094065 | -3.922718 | -1.905868 |
| H | -1.411480 | 0.258671  | -4.967458 |
| H | -1.370086 | -1.408619 | -5.522380 |
| H | -2.639067 | -0.892052 | -4.416966 |
| H | 2.121419  | 0.884169  | -3.474659 |
| H | 1.720581  | 0.000946  | -4.944478 |
| H | 0.624068  | 1.239984  | -4.335545 |
| H | 2.949275  | -0.232711 | -1.654437 |
| H | 2.639966  | -1.576668 | -0.564211 |
| H | 3.263515  | -1.887788 | -2.179222 |

Yb(III)N<sub>2</sub>H

E = -2748.056063

H = -2747.201588

G = -2747.327419

|    |           |           |           |
|----|-----------|-----------|-----------|
| Yb | -0.609649 | 0.244730  | -0.958756 |
| C  | 0.337836  | -2.216929 | -1.385532 |
| C  | 1.304285  | -1.296141 | -1.883102 |
| C  | 0.749624  | -0.652680 | -3.028297 |
| C  | -0.555945 | -1.180812 | -3.238933 |
| C  | -0.800551 | -2.164721 | -2.245800 |
| C  | -2.686795 | -0.865741 | 0.387398  |
| C  | -1.902280 | -0.187306 | 1.359514  |
| C  | -2.013160 | 1.213344  | 1.113067  |
| C  | -2.869597 | 1.395748  | -0.009549 |
| C  | -3.271464 | 0.114418  | -0.473331 |
| N  | -0.956409 | 2.168736  | -2.282498 |
| C  | -1.846738 | 2.380986  | -3.268098 |
| C  | -2.161406 | 3.626558  | -3.780659 |
| C  | -1.540166 | 4.759858  | -3.201951 |
| C  | -0.632253 | 4.576805  | -2.187197 |
| C  | -0.303840 | 3.262652  | -1.745329 |
| C  | 0.742874  | 3.049820  | -0.821185 |
| N  | 1.200917  | 1.839554  | -0.438889 |
| C  | 2.549290  | 1.878763  | 0.034945  |
| C  | 2.898357  | 1.325998  | 1.296819  |
| C  | 4.223375  | 1.385599  | 1.738842  |
| C  | 5.222539  | 1.983096  | 0.983776  |
| C  | 4.887233  | 2.521060  | -0.250428 |
| C  | 3.582381  | 2.476262  | -0.754899 |
| C  | 1.880673  | 0.734258  | 2.255696  |

|   |           |           |           |
|---|-----------|-----------|-----------|
| C | 1.705203  | 1.651055  | 3.478076  |
| C | 3.384620  | 3.049750  | -2.157301 |
| C | 3.508745  | 4.583174  | -2.177658 |
| C | 2.261931  | -0.682020 | 2.710982  |
| C | 4.380215  | 2.459648  | -3.172777 |
| C | -3.441054 | 2.718032  | -0.424390 |
| H | -2.339759 | 1.493193  | -3.654783 |
| H | 2.642350  | 1.728066  | 4.040745  |
| H | 0.943651  | 1.258746  | 4.162883  |
| H | 1.413140  | 2.662574  | 3.180933  |
| H | 2.410592  | -1.353919 | 1.860800  |
| H | 1.482974  | -1.110297 | 3.349694  |
| H | 3.190701  | -0.679545 | 3.291223  |
| H | 4.513160  | 4.895270  | -1.869174 |
| H | 2.795691  | 5.066260  | -1.503609 |
| H | 3.333436  | 4.969273  | -3.188498 |
| H | 4.408716  | 1.366665  | -3.136346 |
| H | 5.400069  | 2.818752  | -2.997031 |
| H | 4.101728  | 2.760122  | -4.189240 |
| H | 4.474514  | 0.973524  | 2.712750  |
| H | 6.244445  | 2.028821  | 1.350410  |
| H | 5.666165  | 2.980751  | -0.852996 |
| H | -0.130007 | 5.422940  | -1.726366 |
| H | -1.776601 | 5.759645  | -3.555338 |
| H | -2.881769 | 3.719208  | -4.585934 |
| H | 1.260110  | 3.941674  | -0.464464 |
| C | -3.141843 | -2.288508 | 0.535699  |
| C | -1.358378 | -0.841290 | 2.595872  |
| C | -1.550271 | 2.330945  | 2.000920  |
| C | -1.408302 | -0.956646 | -4.454596 |
| C | 1.457322  | 0.273302  | -3.966361 |
| C | 2.731261  | -1.212994 | -1.421417 |
| H | 0.918973  | 0.686344  | 1.731740  |
| H | 2.378938  | 2.789531  | -2.496994 |
| C | -4.314503 | -0.150128 | -1.521372 |
| C | -1.895801 | -3.185962 | -2.346407 |
| C | 0.593554  | -3.221743 | -0.296804 |
| H | -3.678113 | -2.645016 | -0.345048 |
| H | -2.319877 | -2.983373 | 0.733222  |
| H | -3.834386 | -2.365489 | 1.386193  |
| H | -4.383110 | 0.668470  | -2.244506 |
| H | -4.119122 | -1.067859 | -2.084407 |
| H | -5.310751 | -0.258280 | -1.070052 |
| H | -2.682510 | 3.502802  | -0.498833 |
| H | -3.950671 | 2.664219  | -1.389516 |
| H | -4.181595 | 3.055838  | 0.314272  |
| H | -0.906532 | 1.972127  | 2.805519  |
| H | -0.998865 | 3.103919  | 1.454123  |
| H | -2.411702 | 2.823444  | 2.473025  |
| H | -0.920130 | -1.822985 | 2.388449  |

|   |           |           |           |
|---|-----------|-----------|-----------|
| H | -0.595805 | -0.233809 | 3.086985  |
| H | -2.160826 | -0.999409 | 3.330965  |
| H | -0.308362 | -3.785362 | -0.044492 |
| H | 1.353121  | -3.952014 | -0.607587 |
| H | 0.958503  | -2.764584 | 0.629637  |
| H | -2.886626 | -2.744475 | -2.490916 |
| H | -1.712014 | -3.833414 | -3.215478 |
| H | -1.944365 | -3.833938 | -1.470140 |
| H | -1.181794 | -0.006146 | -4.945895 |
| H | -1.236381 | -1.746402 | -5.200322 |
| H | -2.479990 | -0.972459 | -4.225335 |
| H | 2.372241  | 0.667812  | -3.524034 |
| H | 1.742233  | -0.248944 | -4.890429 |
| H | 0.839417  | 1.129930  | -4.256550 |
| H | 3.202526  | -0.269552 | -1.701379 |
| H | 2.831573  | -1.305820 | -0.336418 |
| H | 3.325315  | -2.023572 | -1.867236 |
